# Supplementary material for: Trikoramides B–D, Bioactive Cyanobactins from the Marine Cyanobacterium Symploca hydnoides
Source: MDPI journal article supplement (doi:10.3390/md19100548), 2021-09-28
Supplement: s1 [file s1]

## Supplementary Data

**Trikoramides B-D, bioactive cyanobactins from the marine cyanobacterium *Symploca hydnoides***

Ma Yadanar Phy<sup>1</sup>, Teo Min Ben Goh<sup>1</sup>, Jun Xian Goh<sup>1</sup> and Lik Tong Tan<sup>1, \*</sup>

<sup>1</sup> Natural Sciences and Science Education, National Institute of Education, Nanyang Technological University, 1 Nanyang Walk, Singapore 637616, Singapore

\*Corresponding author: Tel: +65 6790 3842; Fax: +65 6896 9414

E-mail address: [liktong.tan@nie.edu.sg](mailto:liktong.tan@nie.edu.sg) (L.T. Tan)

**Keywords:** *Symploca hydnoides*; Microcoleaceae; cyanobactin; trikoramides; cytotoxic; quorum sensing inhibitors

| <b>Figure</b> | <b>Title</b>                                                                    | <b>Page</b> |
|---------------|---------------------------------------------------------------------------------|-------------|
| S1            | HR mass spectrum and MS/MS spectrum of trikoramide B (1)                        | 3           |
| S2            | HR mass spectrum and MS/MS spectrum of trikoramide C (2)                        | 4           |
| S3            | HR mass spectrum and MS/MS spectrum of trikoramide D (3)                        | 5           |
| S4            | <sup>1</sup> H NMR (400 MHz, CDCl <sub>3</sub> ) spectrum of trikoramide B (1)  | 6           |
| S5            | <sup>13</sup> C NMR (100 MHz, CDCl <sub>3</sub> ) spectrum of trikoramide B (1) | 7           |
| S6            | DEPT 90 NMR (100 MHz, CDCl <sub>3</sub> ) spectrum of trikoramide B (1)         | 8           |
| S7            | DEPT 135 NMR (100 MHz, CDCl <sub>3</sub> ) spectrum of trikoramide B (1)        | 9           |
| S8            | HSQC NMR (100 MHz, 400 MHz, CDCl <sub>3</sub> ) spectrum of trikoramide B (1)   | 10          |
| S9            | HMBC NMR (100 MHz, 400 MHz, CDCl <sub>3</sub> ) spectrum of trikoramide B (1)   | 11          |
| S10           | COSY NMR (400 MHz, CDCl <sub>3</sub> ) spectrum of trikoramide B (1)            | 12          |
| S11           | NOESY NMR (400 MHz, CDCl <sub>3</sub> ) spectrum of trikoramide B (1)           | 13          |
| S12           | <sup>1</sup> H NMR (400 MHz, CDCl <sub>3</sub> ) spectrum of trikoramide C (2)  | 14          |
| S13           | COSY NMR (400 MHz, CDCl <sub>3</sub> ) spectrum of trikoramide C (2)            | 15          |
| S14           | HSQC NMR (400 MHz, 100 MHz, CDCl <sub>3</sub> ) spectrum of trikoramide C (2)   | 16          |
| S15           | <sup>1</sup> H NMR (400 MHz, CDCl <sub>3</sub> ) spectrum of trikoramide D (3)  | 17          |
| S16           | <sup>13</sup> C NMR (100 MHz, CDCl <sub>3</sub> ) spectrum of trikoramide D (3) | 18          |
| S17           | DEPT 90 NMR (100 MHz, CDCl <sub>3</sub> ) spectrum of trikoramide D (3)         | 19          |
| S18           | DEPT 135 NMR (100 MHz, CDCl <sub>3</sub> ) spectrum of trikoramide D (3)        | 20          |
| S19           | COSY NMR (400 MHz, CDCl <sub>3</sub> ) spectrum of trikoramide D (3)            | 21          |
| S20           | HSQC NMR (100 MHz, 400 MHz, CDCl <sub>3</sub> ) spectrum of trikoramide D (3)   | 22          |
| S21           | HMBC NMR (100 MHz, 400 MHz, CDCl <sub>3</sub> ) spectrum of trikoramide D (3)   | 23          |

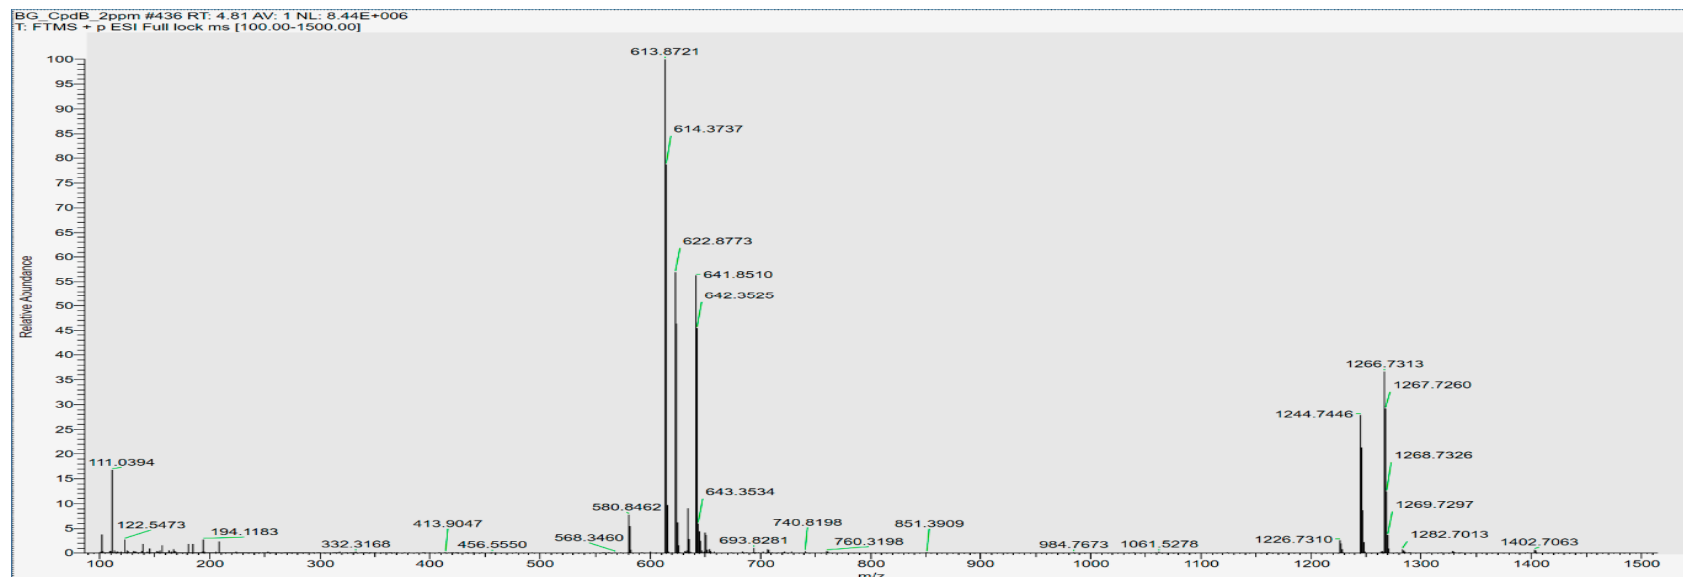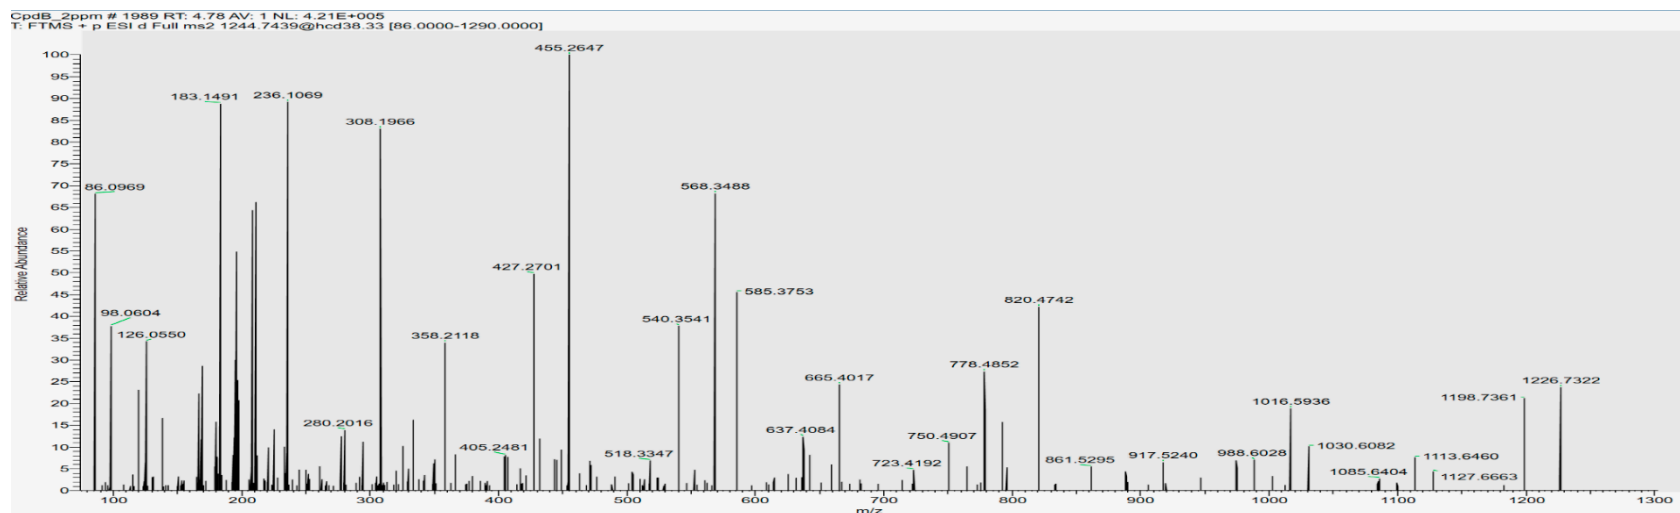

Figure S1. HR mass spectrum and MS/MS spectrum of trikoramide B (1).

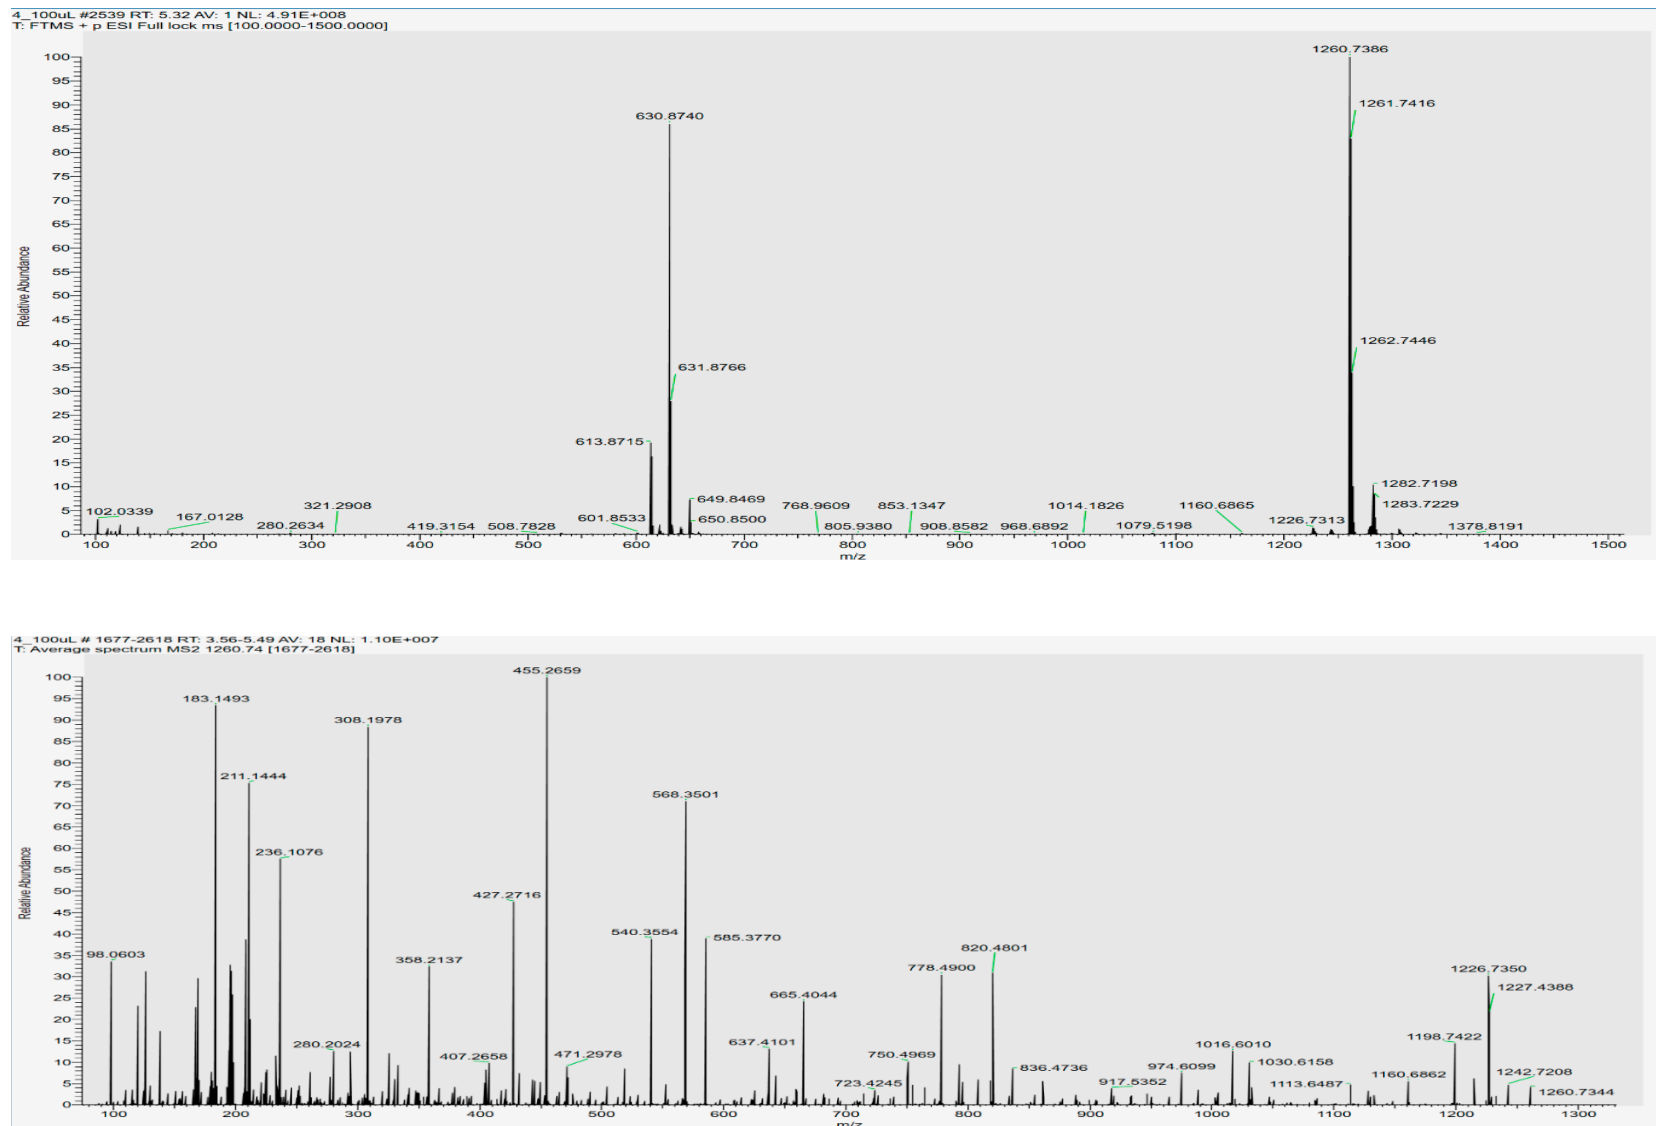

Figure S2. HR mass spectrum and MS/MS spectrum of trikoramide C (2).

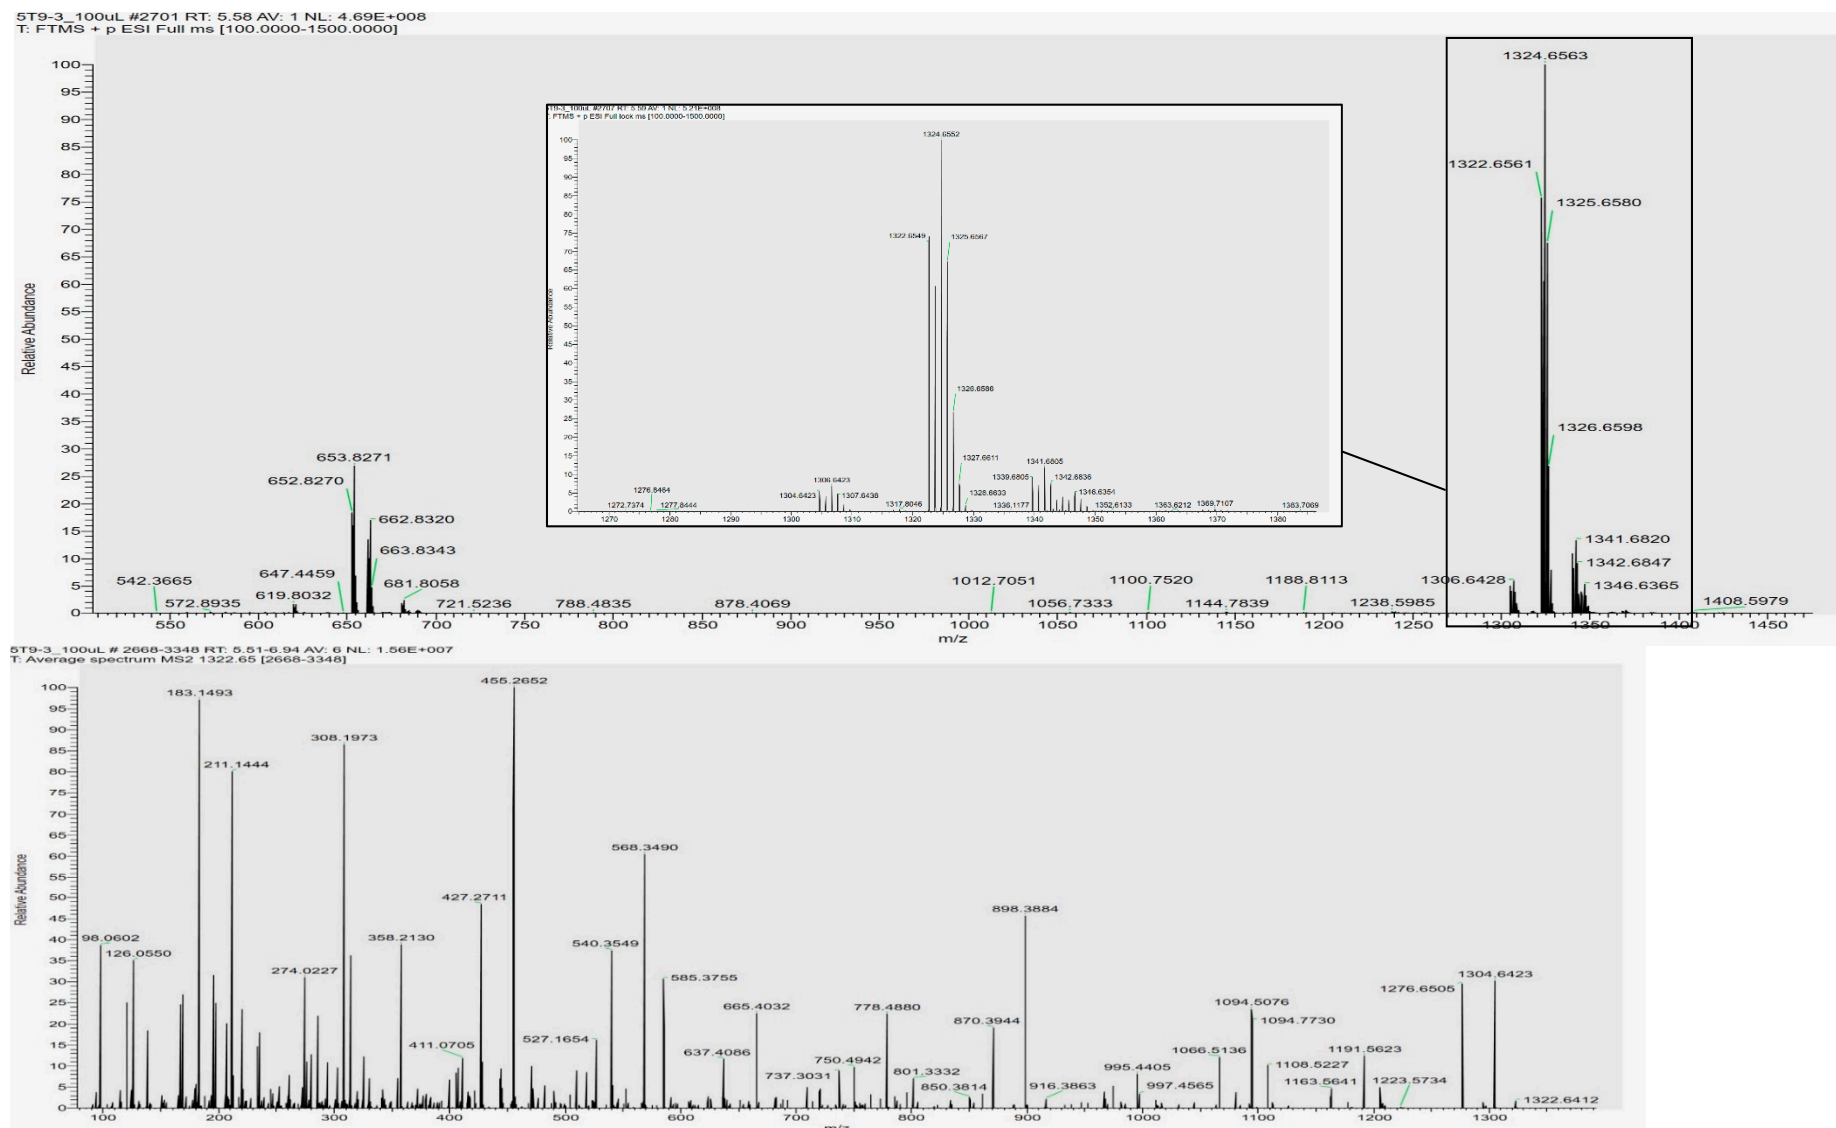

Figure S3. HR mass spectrum and MS/MS spectrum of trikoramide D (3).

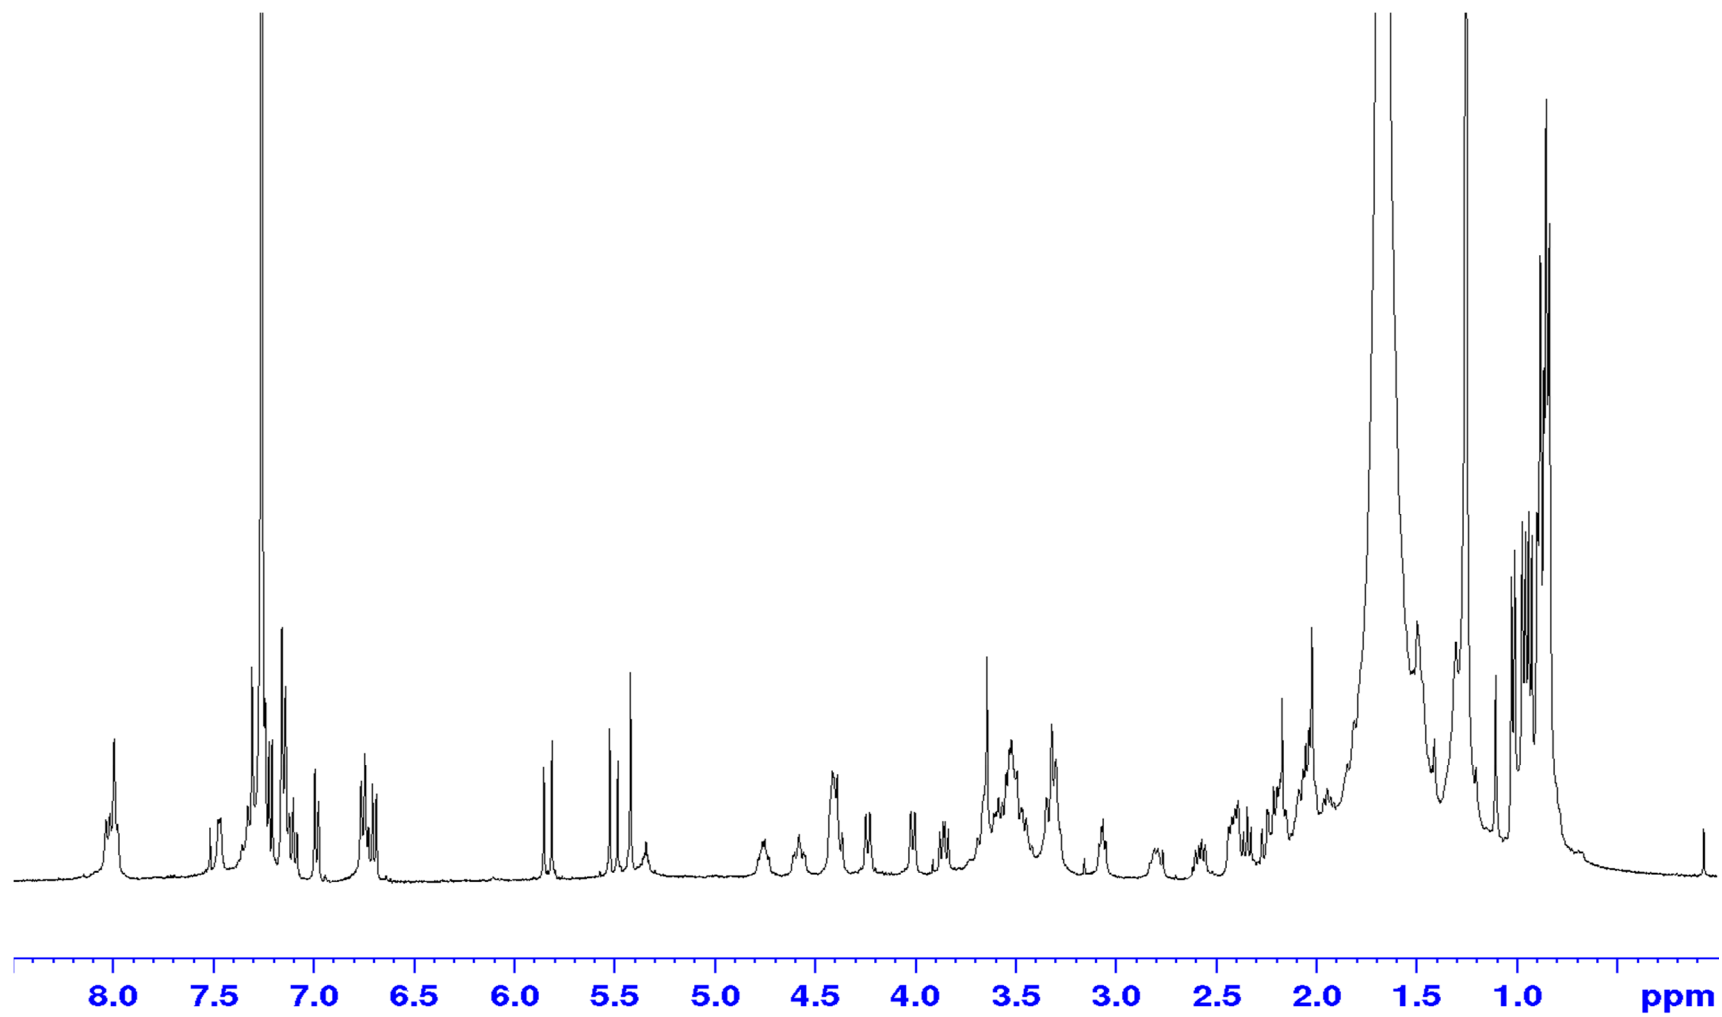

**Figure S4.**  $^1\text{H}$  NMR (400 MHz,  $\text{CDCl}_3$ ) spectrum of trikoramide B (**1**).

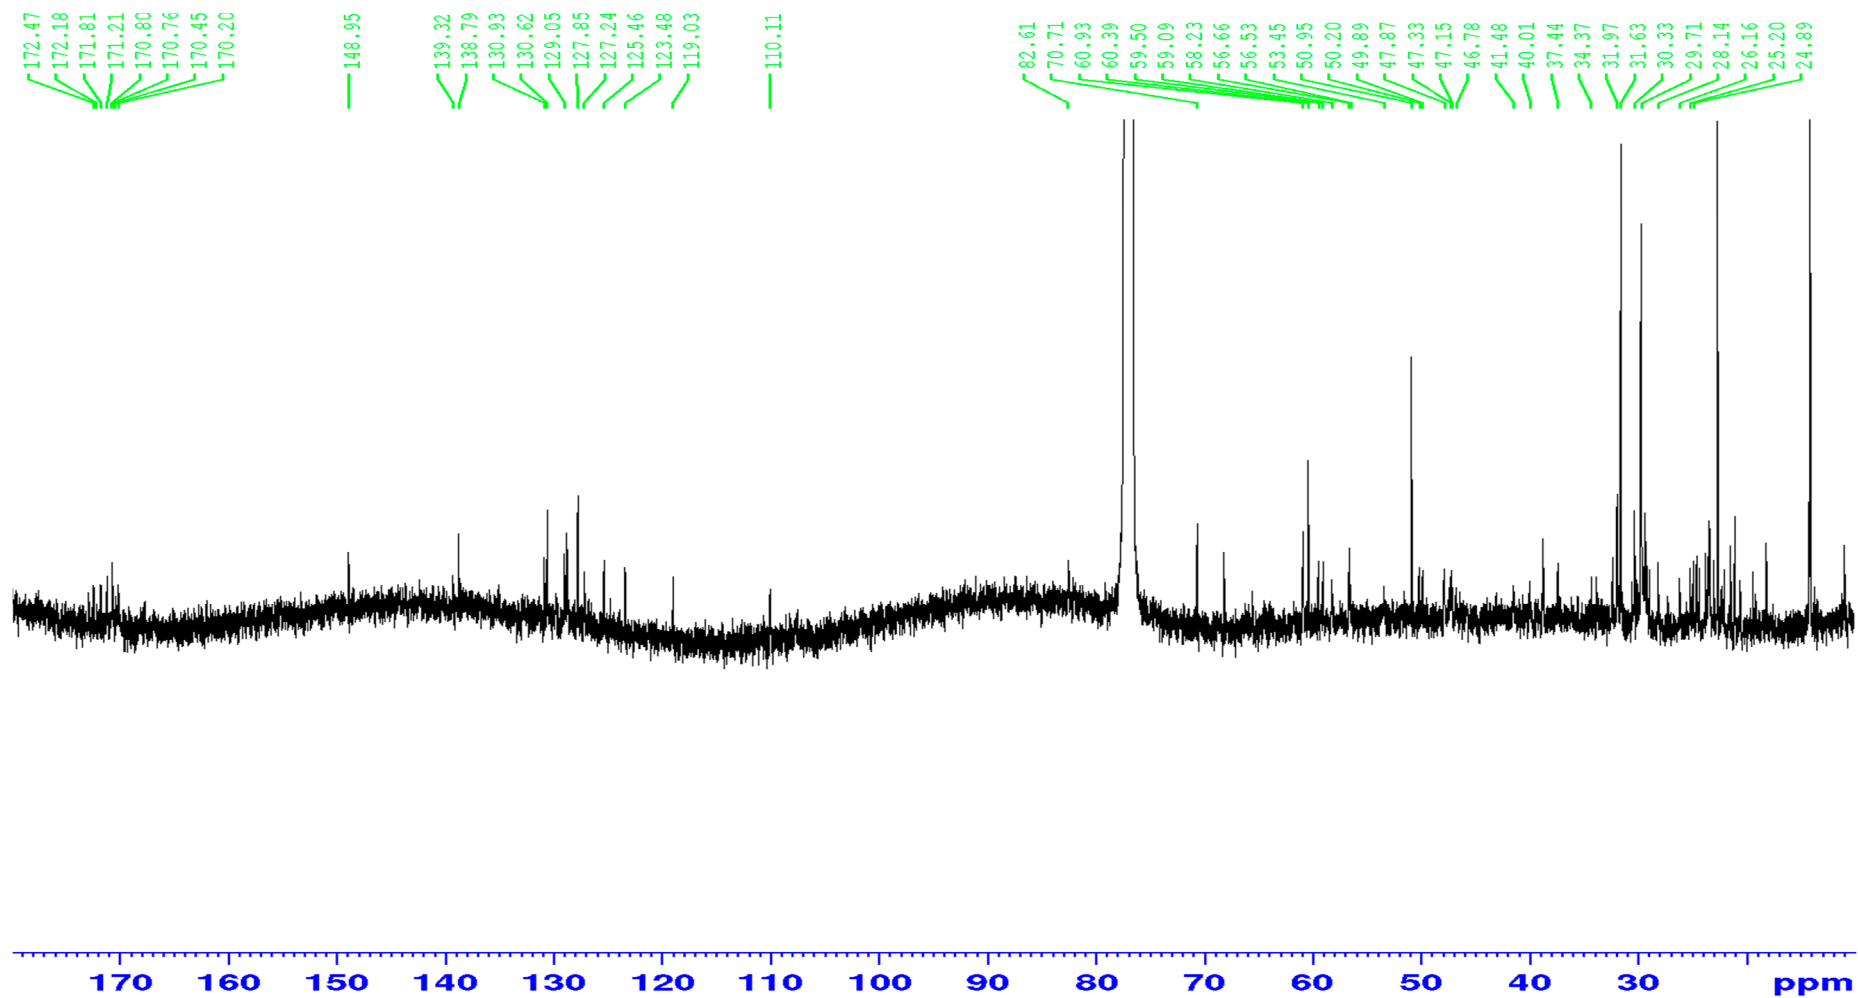

Figure S5. <sup>13</sup>C NMR (100 MHz, CDCl<sub>3</sub>) spectrum of trikoramide B (1).

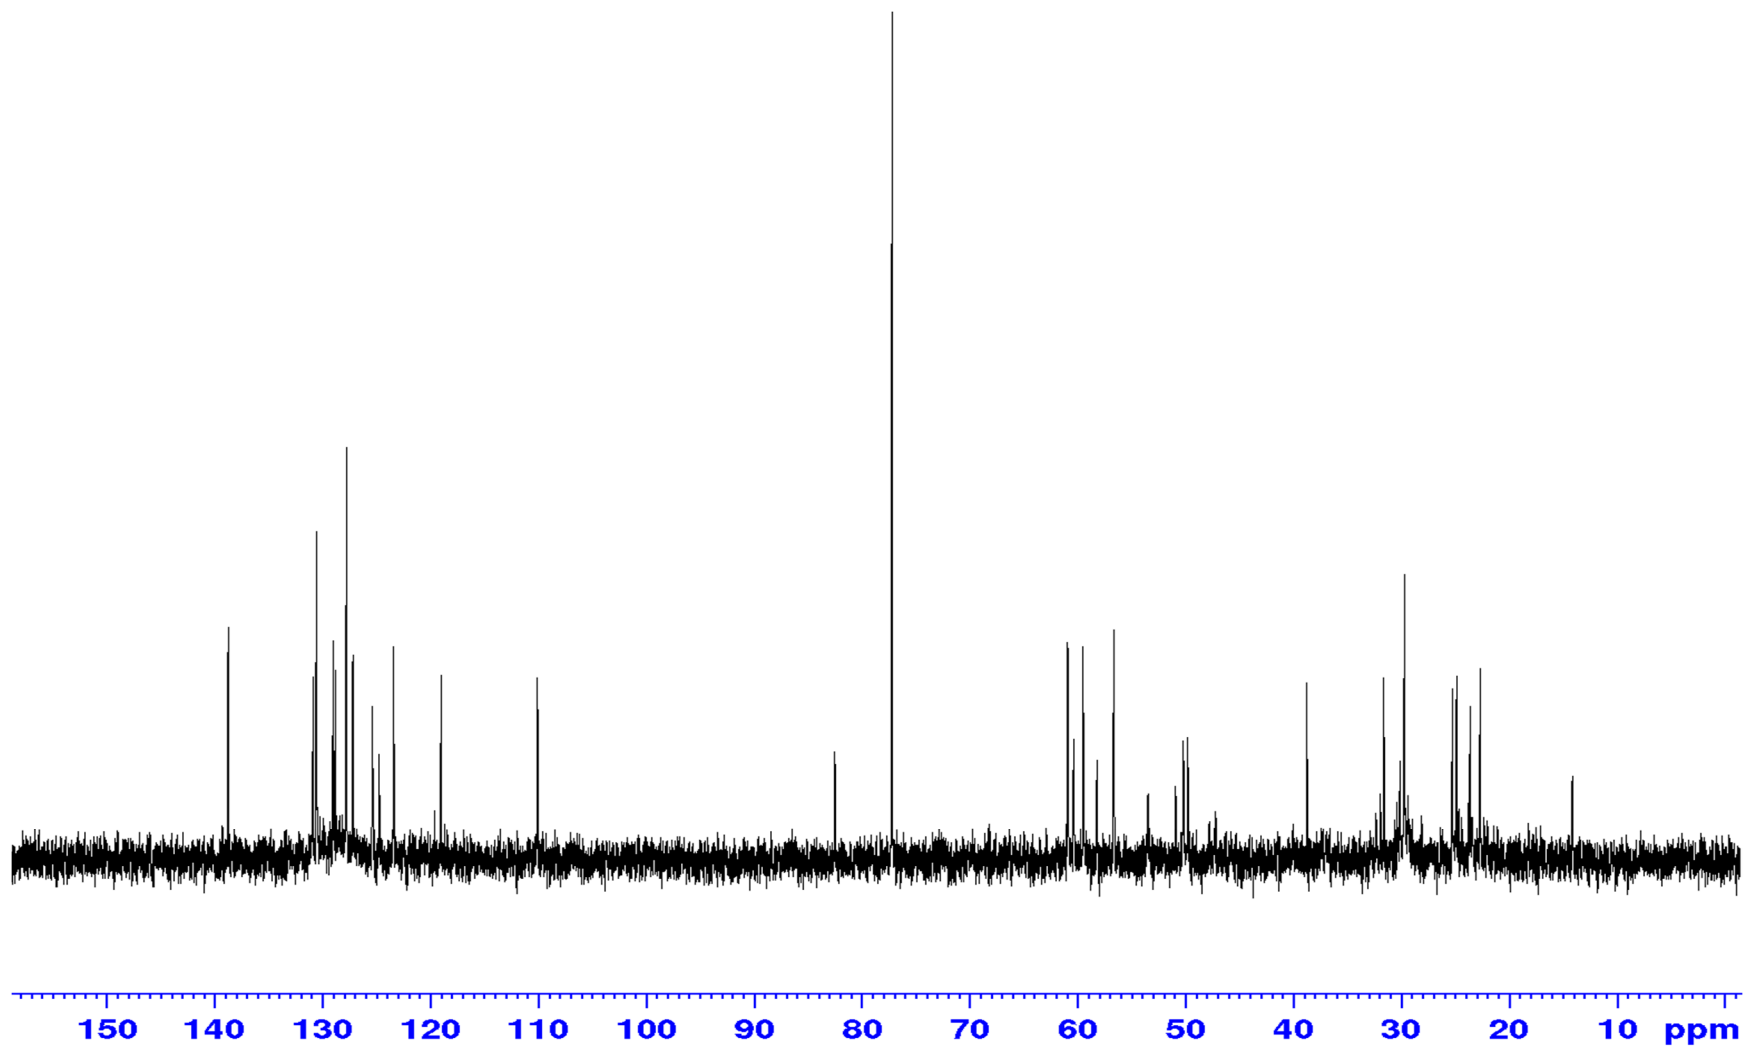

**Figure S6.** DEPT 90 NMR (100 MHz, CDCl<sub>3</sub>) spectrum of trikoramide B (1).



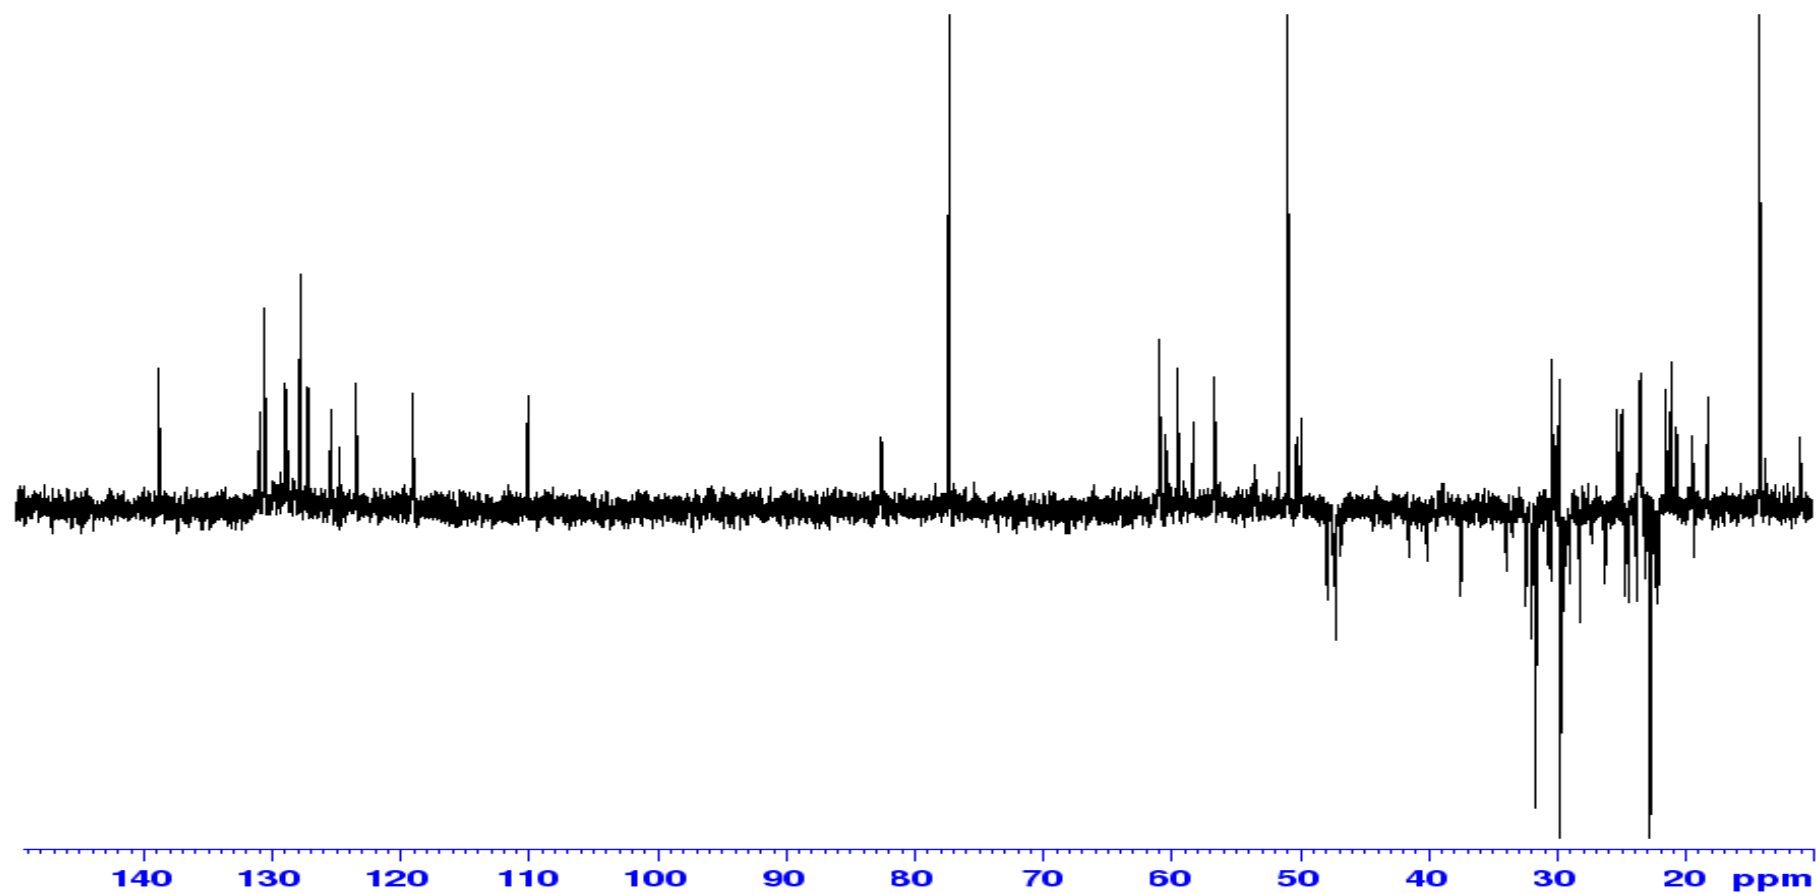

Figure S7. DEPT 135 NMR (100 MHz, CDCl<sub>3</sub>) spectrum of trikoramide B (1).

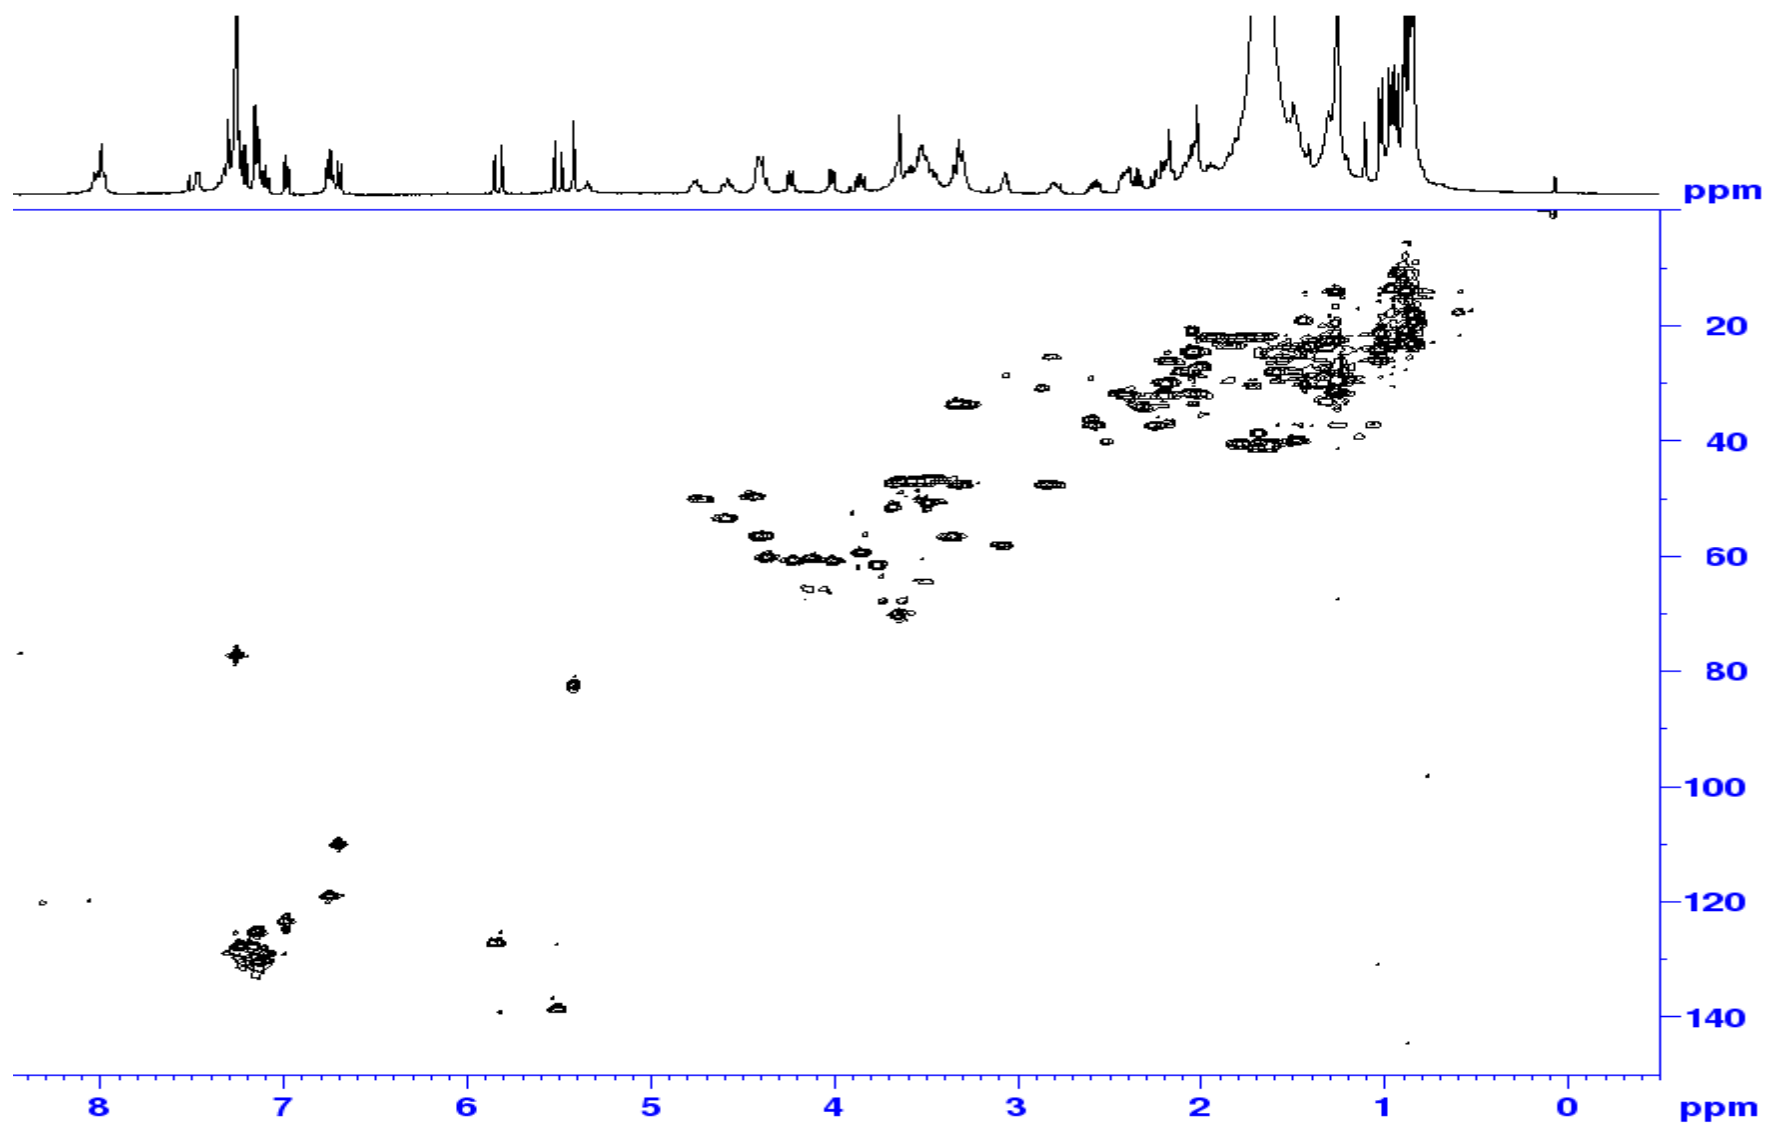

Figure S8. HSQC NMR (100 MHz, 400 MHz,  $\text{CDCl}_3$ ) spectrum of trikoramide B (1).

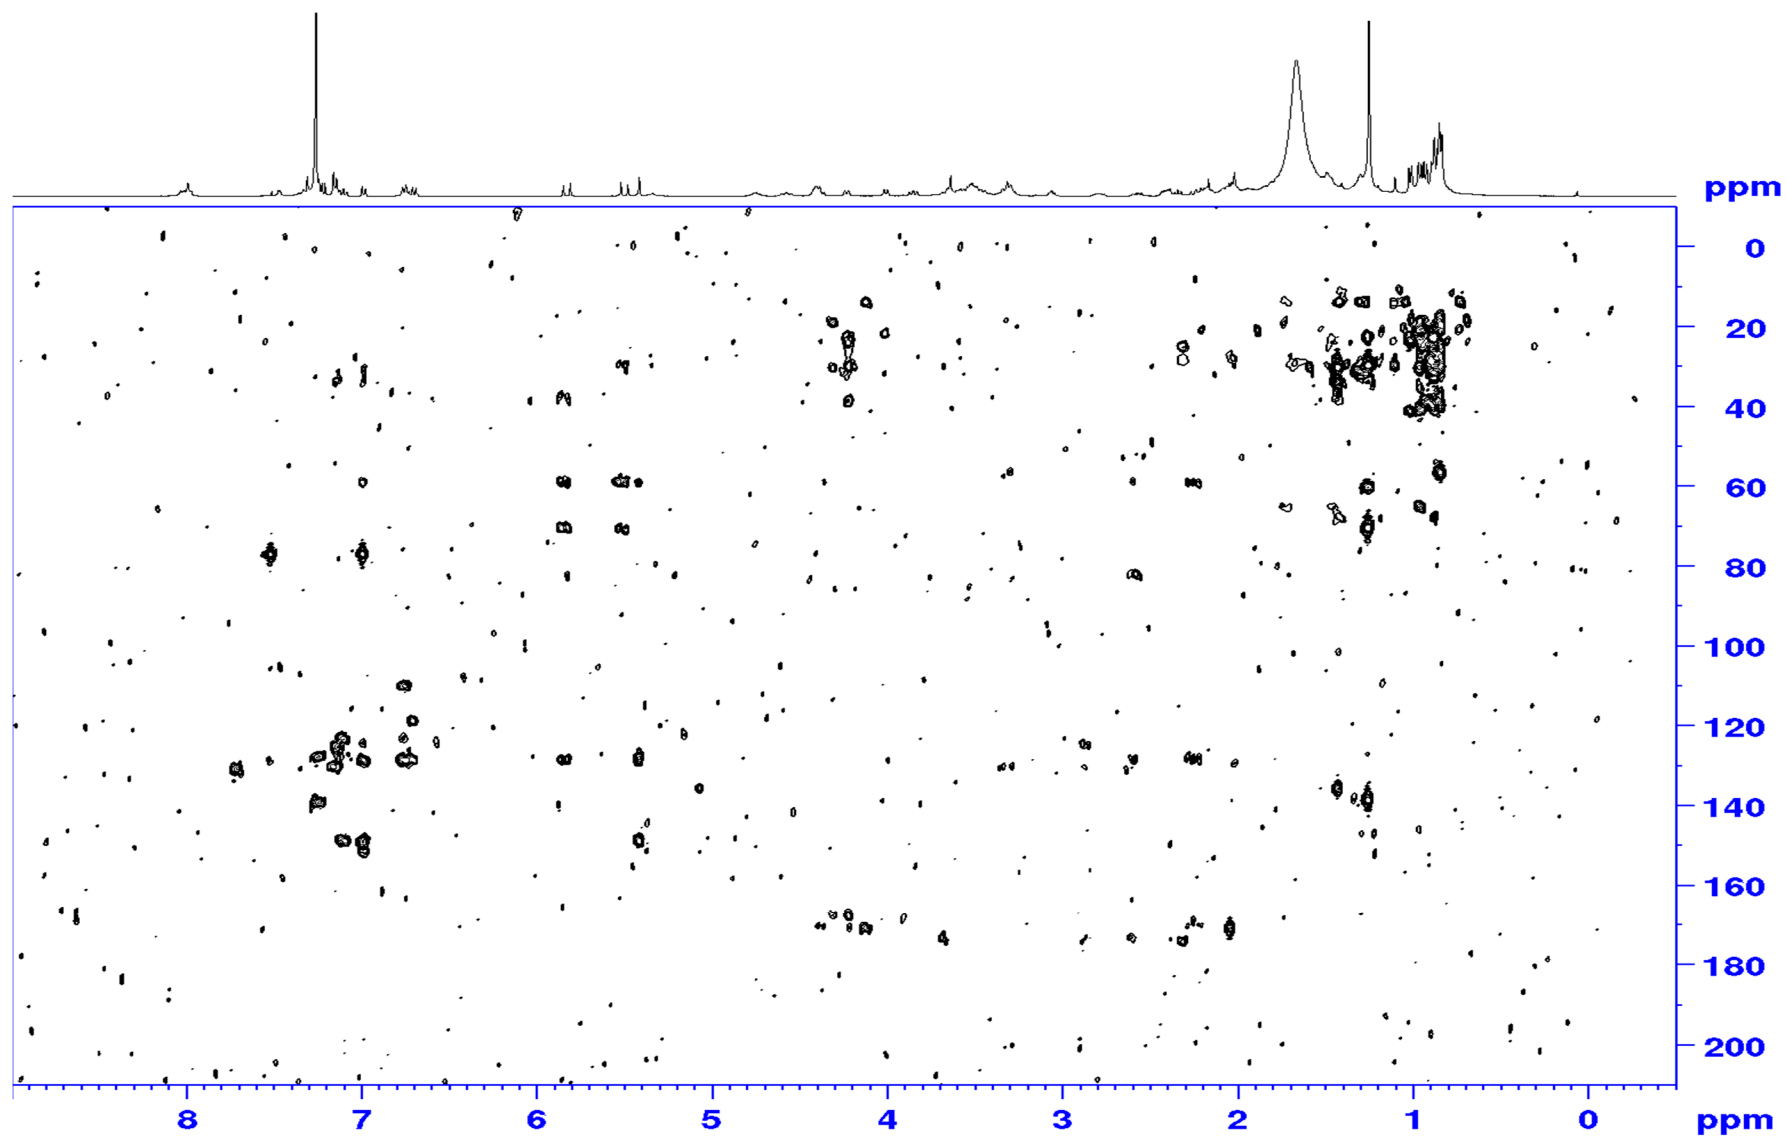

Figure S9. HMBC NMR (100 MHz, 400 MHz, CDCl<sub>3</sub>) spectrum of trikoramide B (1).

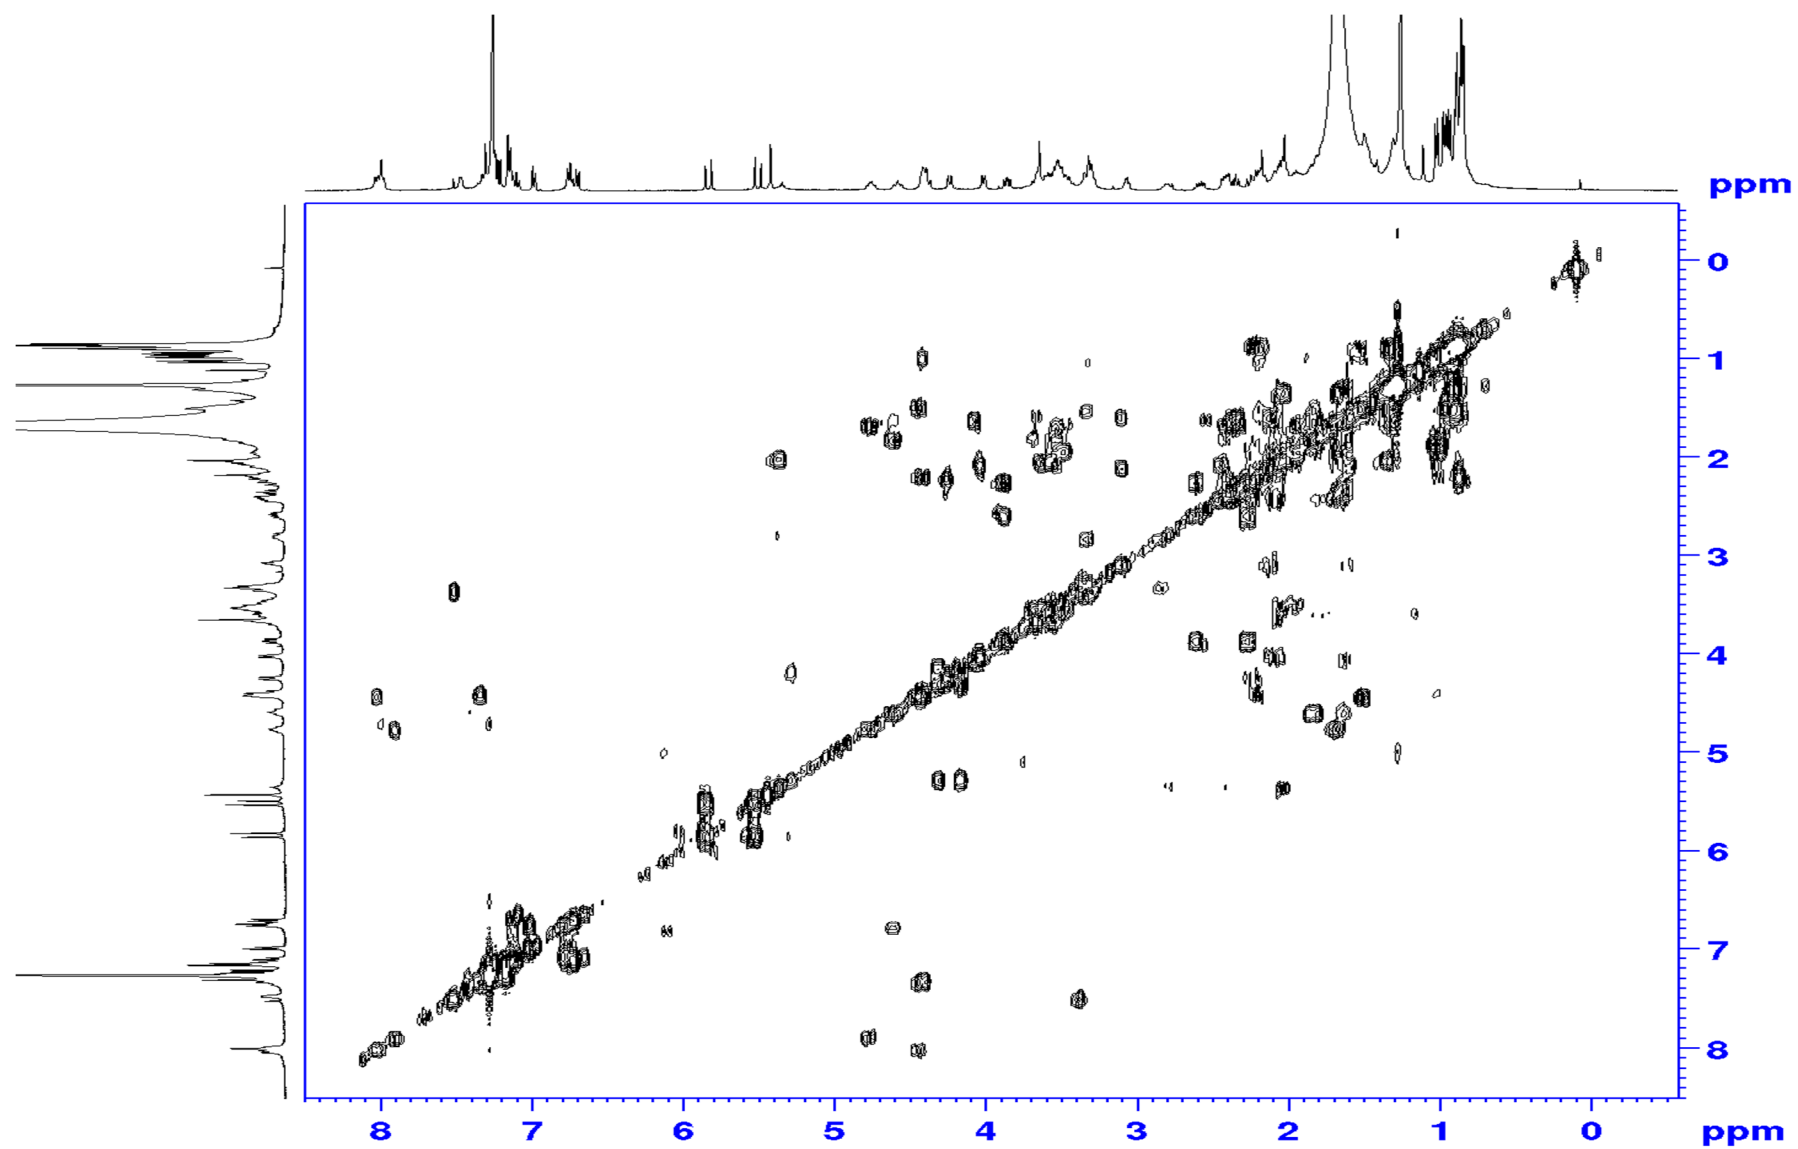

Figure S10. COSY NMR (400 MHz, CDCl<sub>3</sub>) spectrum of trikoramide B (1).

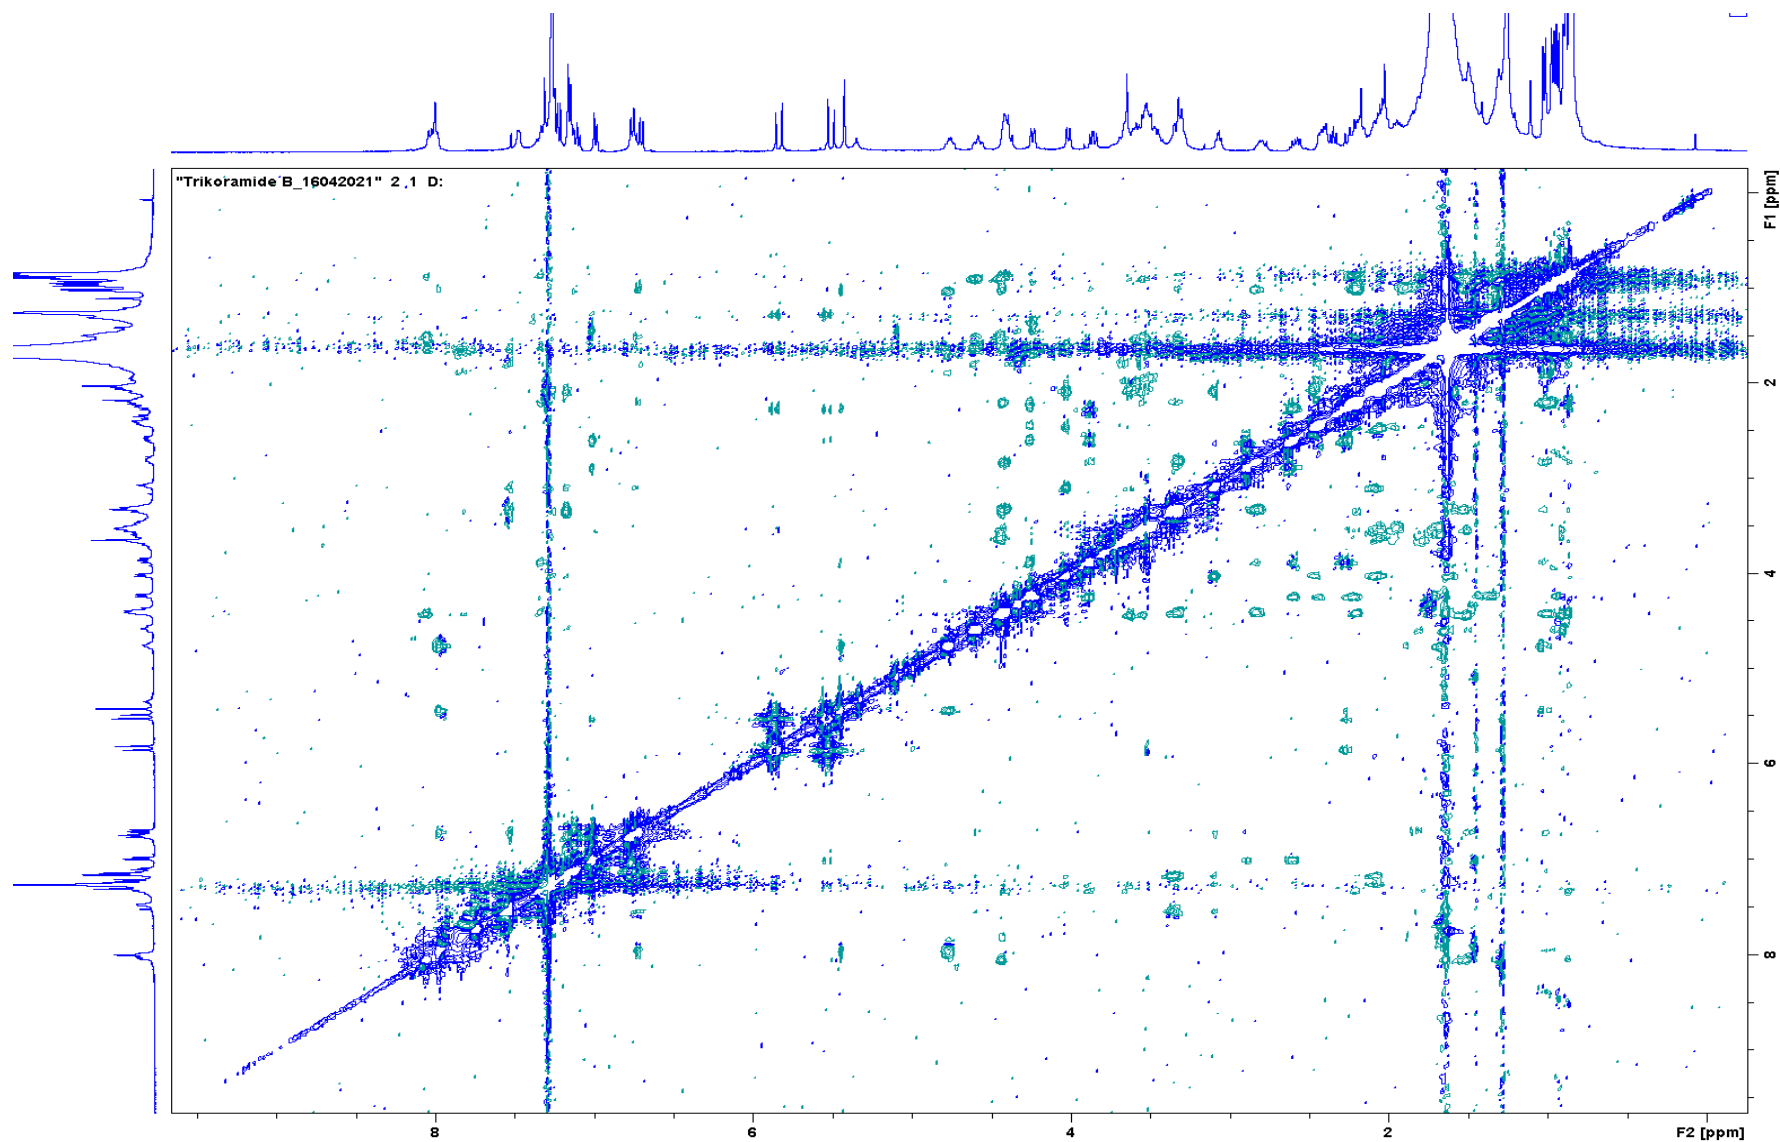

Figure S11. NOESY NMR (400 MHz, CDCl<sub>3</sub>) spectrum of trikoramide B (1).

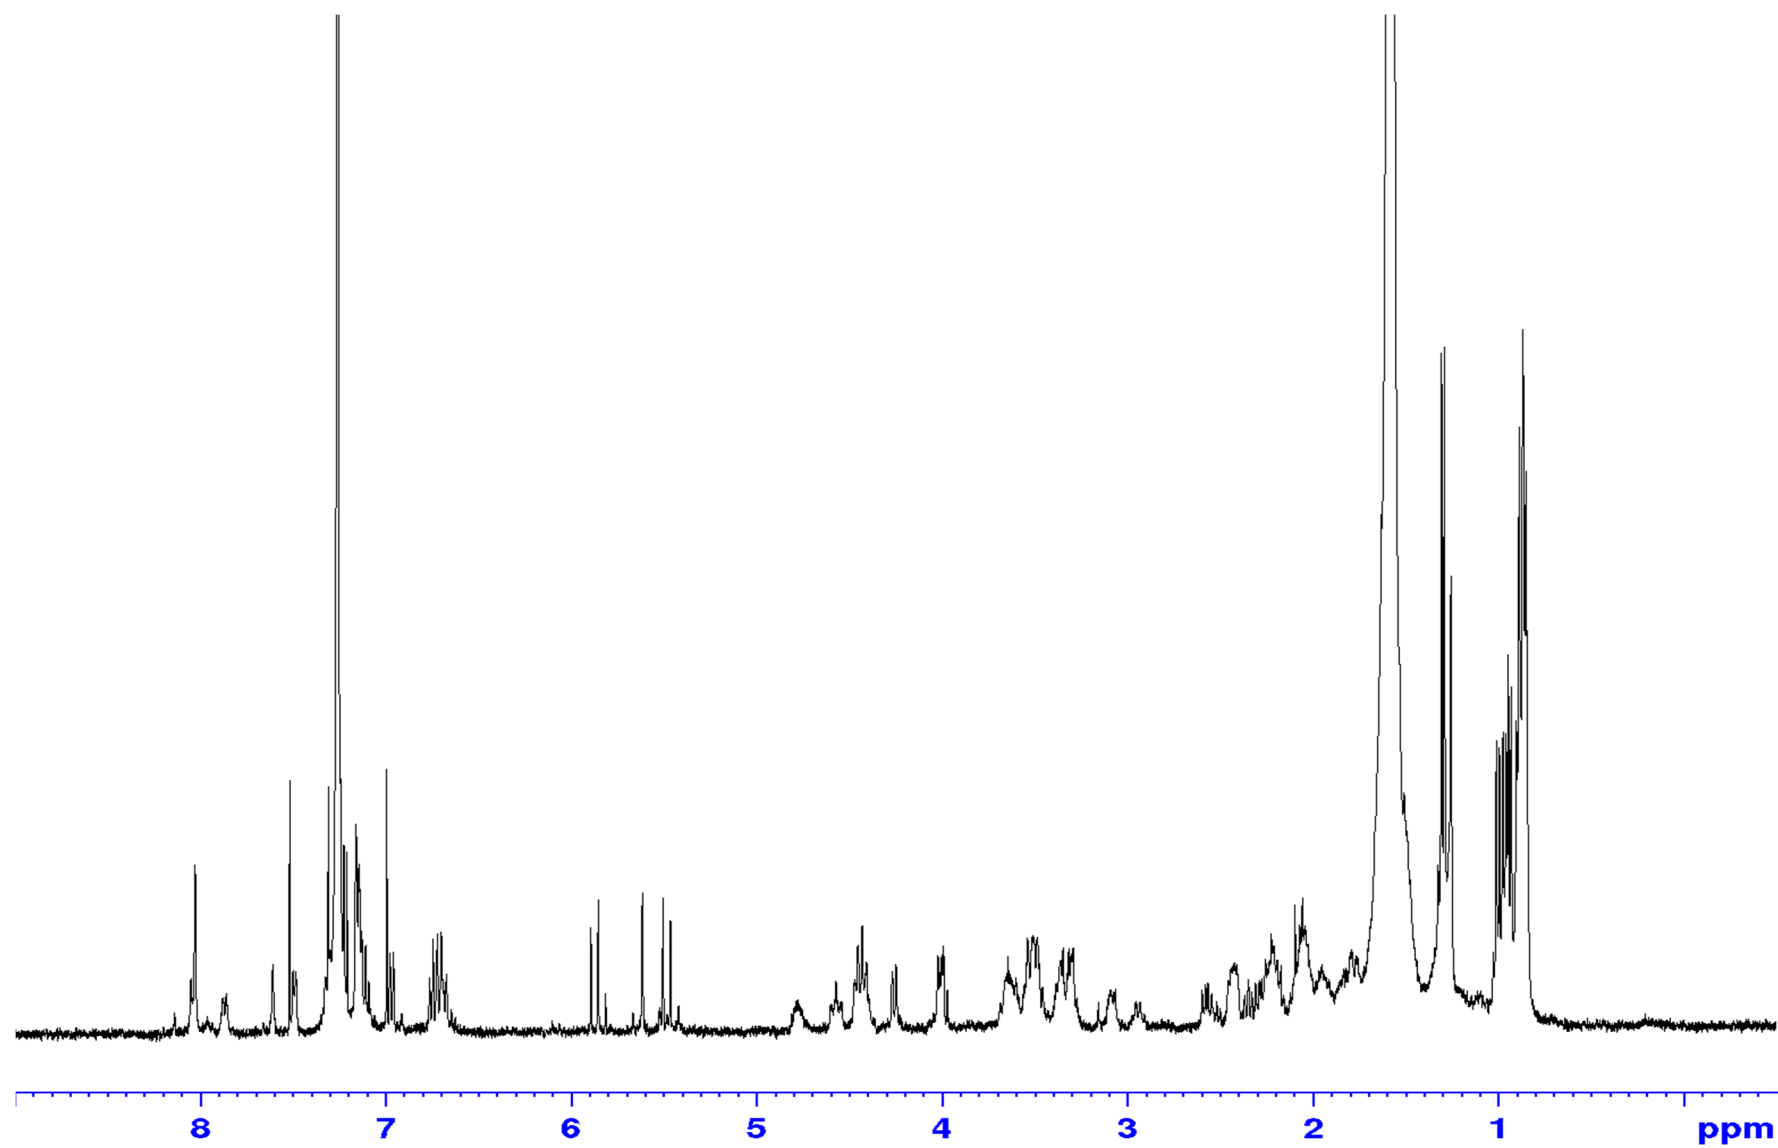

Figure S12.  $^1\text{H}$  NMR (400 MHz,  $\text{CDCl}_3$ ) spectrum of trikoramide C (2).

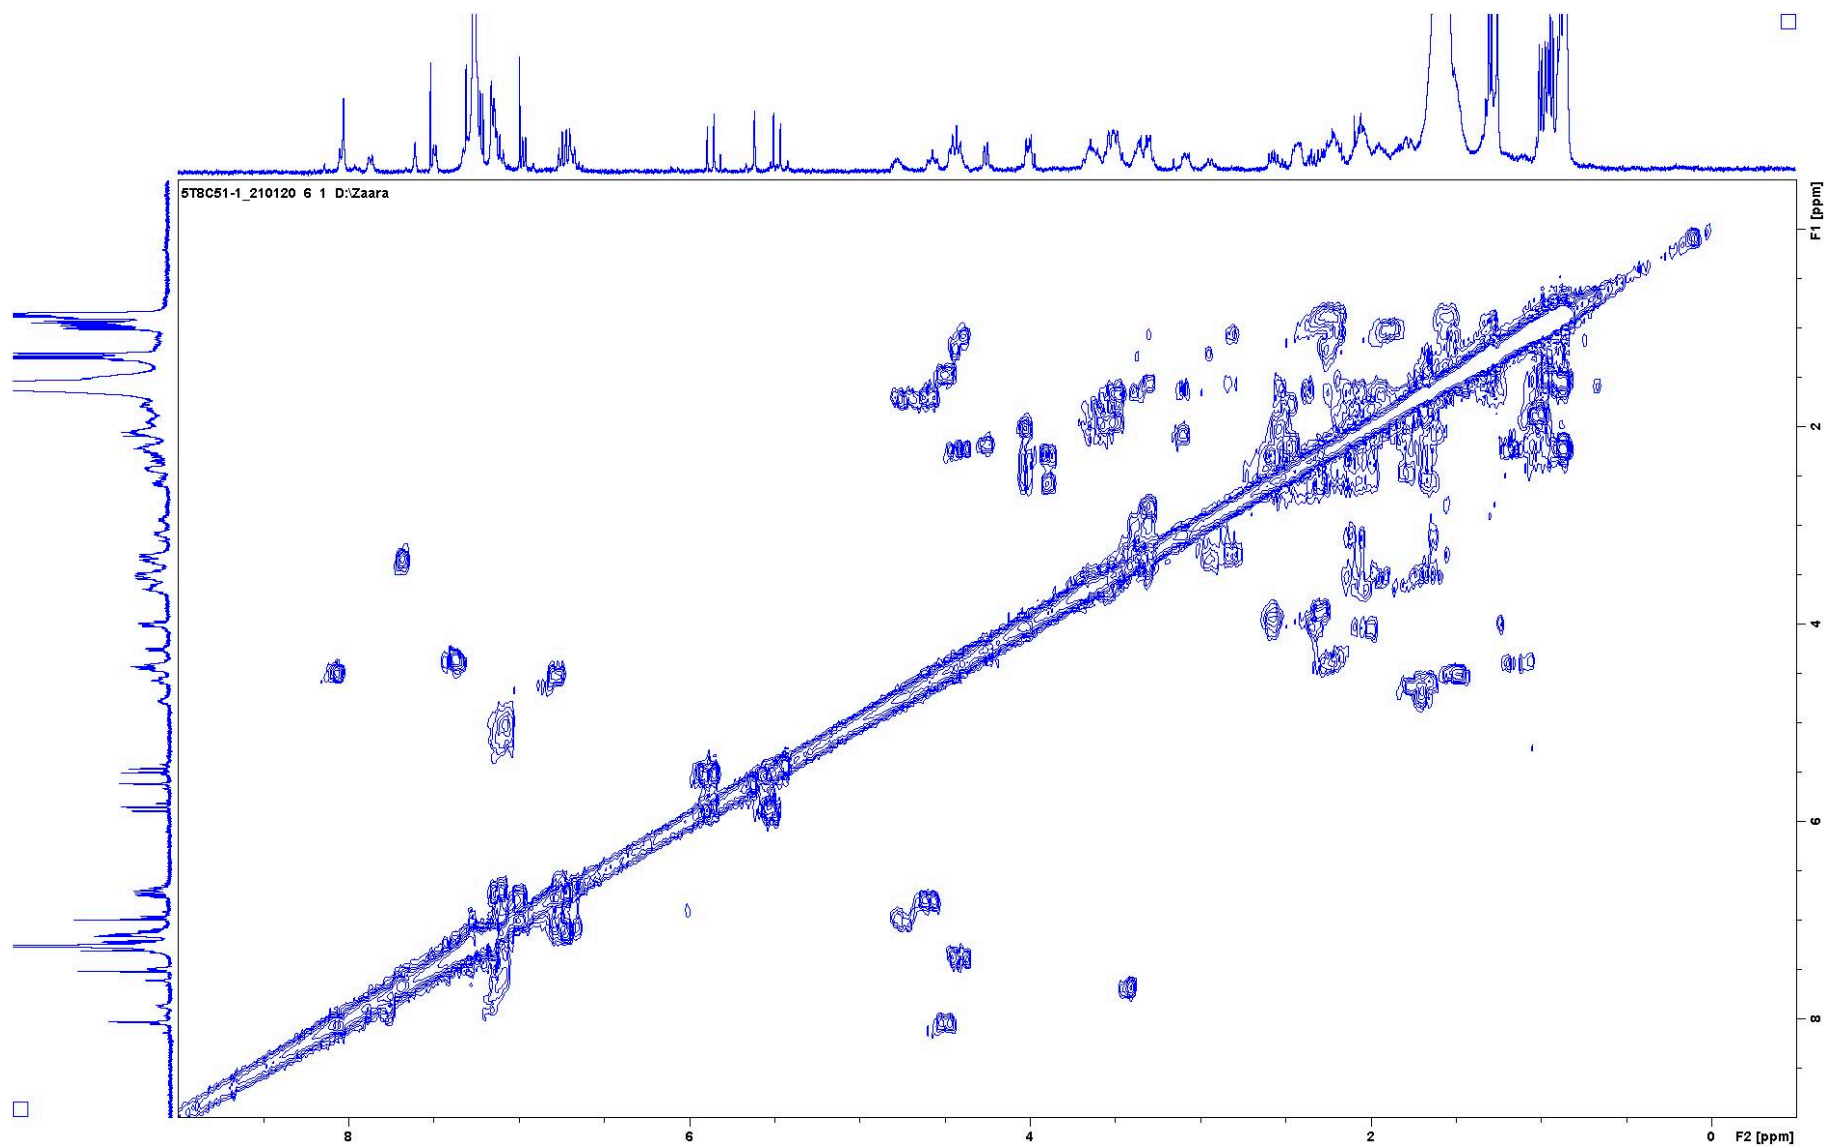

Figure S13. COSY NMR (400 MHz, CDCl<sub>3</sub>) spectrum of trikoramide C (2).

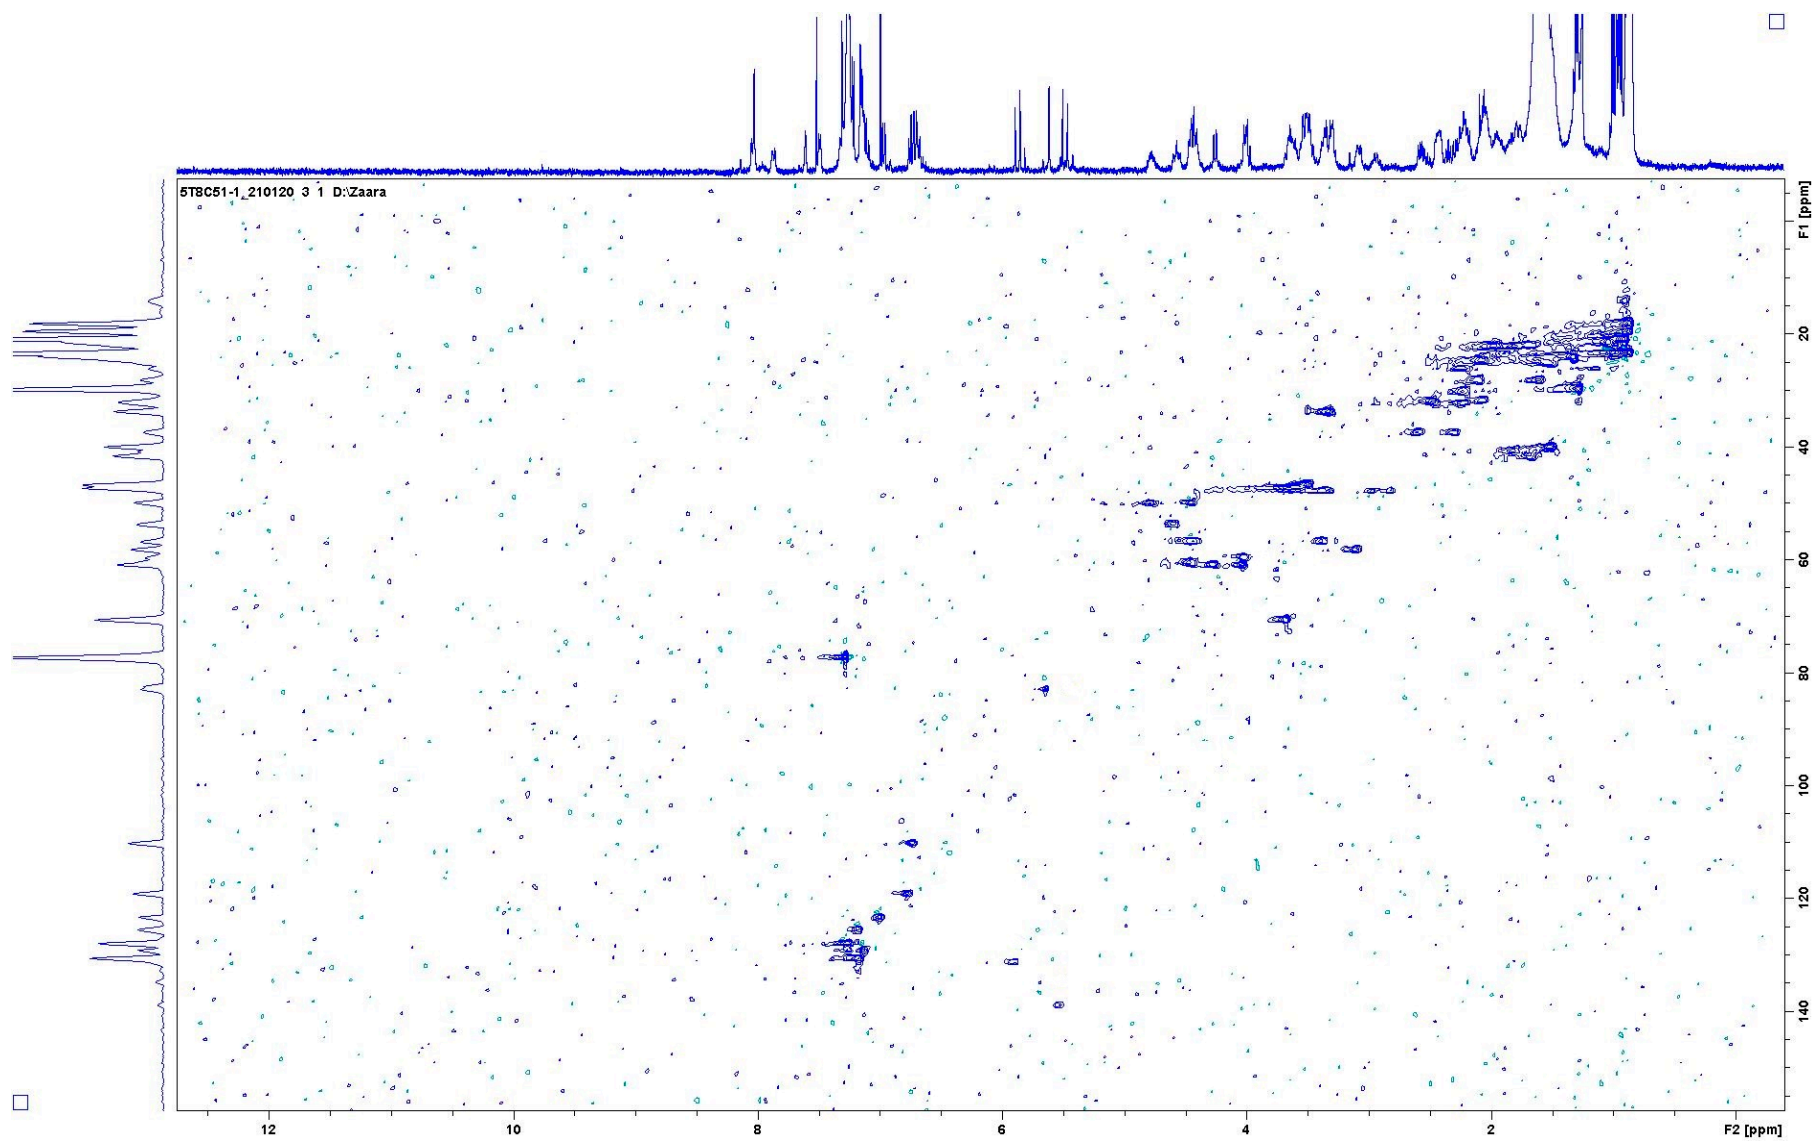

Figure S14. HSQC NMR (400 MHz, 100 MHz, CDCl<sub>3</sub>) spectrum of trikoramide C (2).



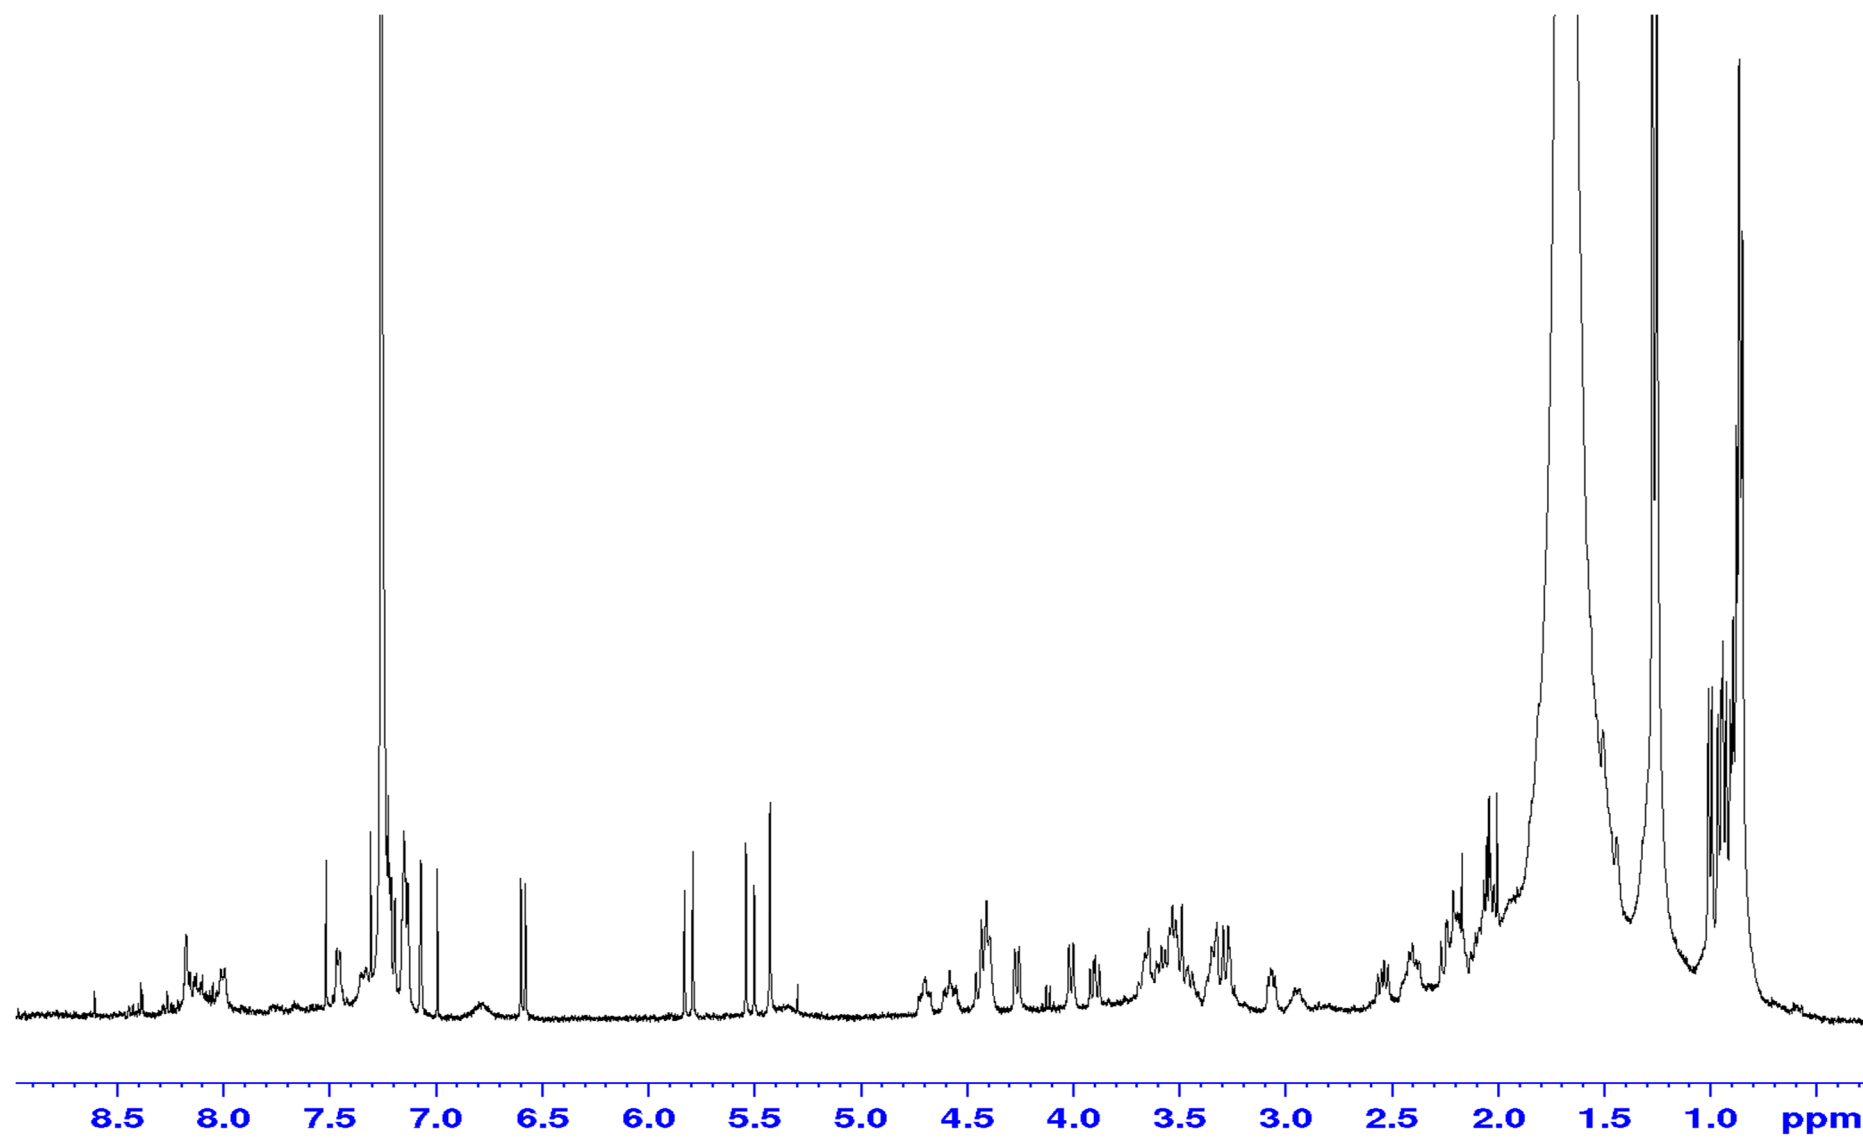

Figure S15.  $^1\text{H}$  NMR (400 MHz,  $\text{CDCl}_3$ ) spectrum of trikoramide D (3).

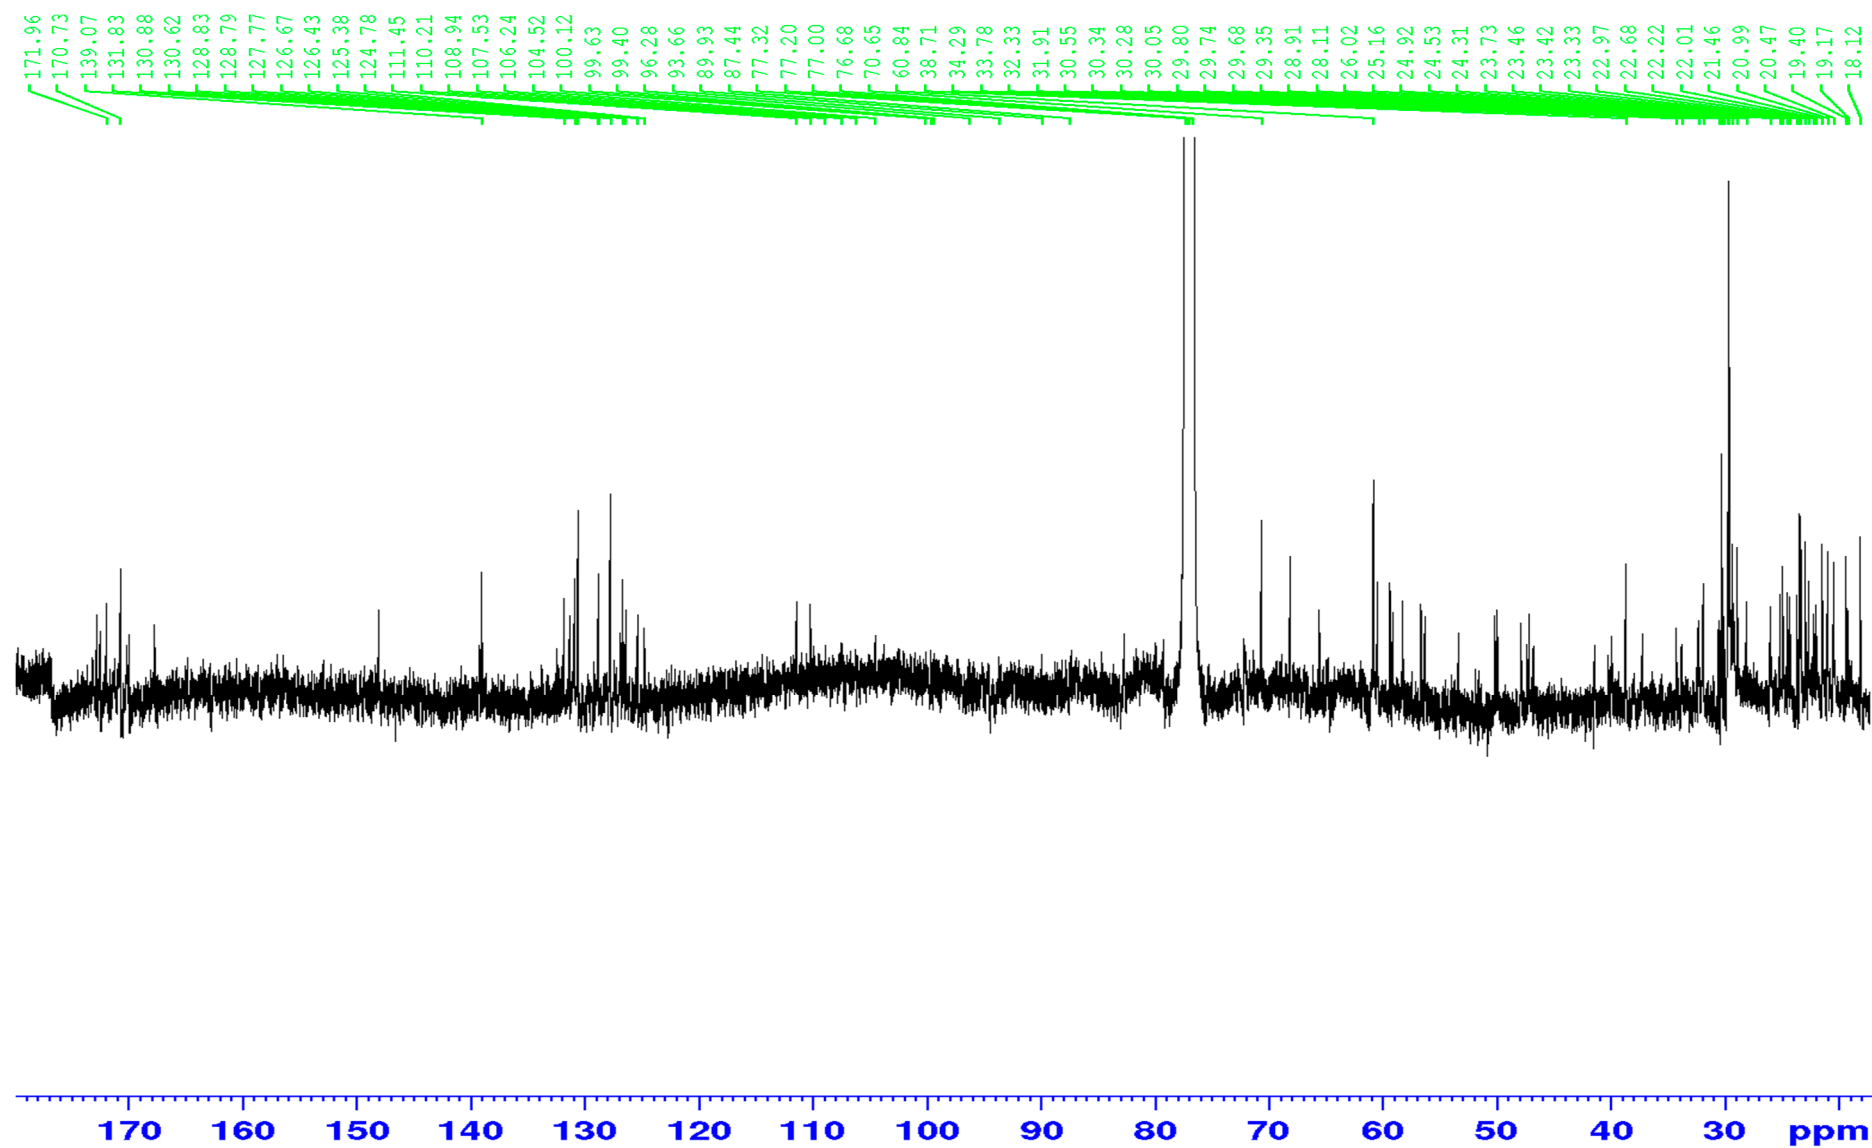

Figure S16. <sup>13</sup>C NMR (100 MHz, CDCl<sub>3</sub>) spectrum of trikoramide D (3).

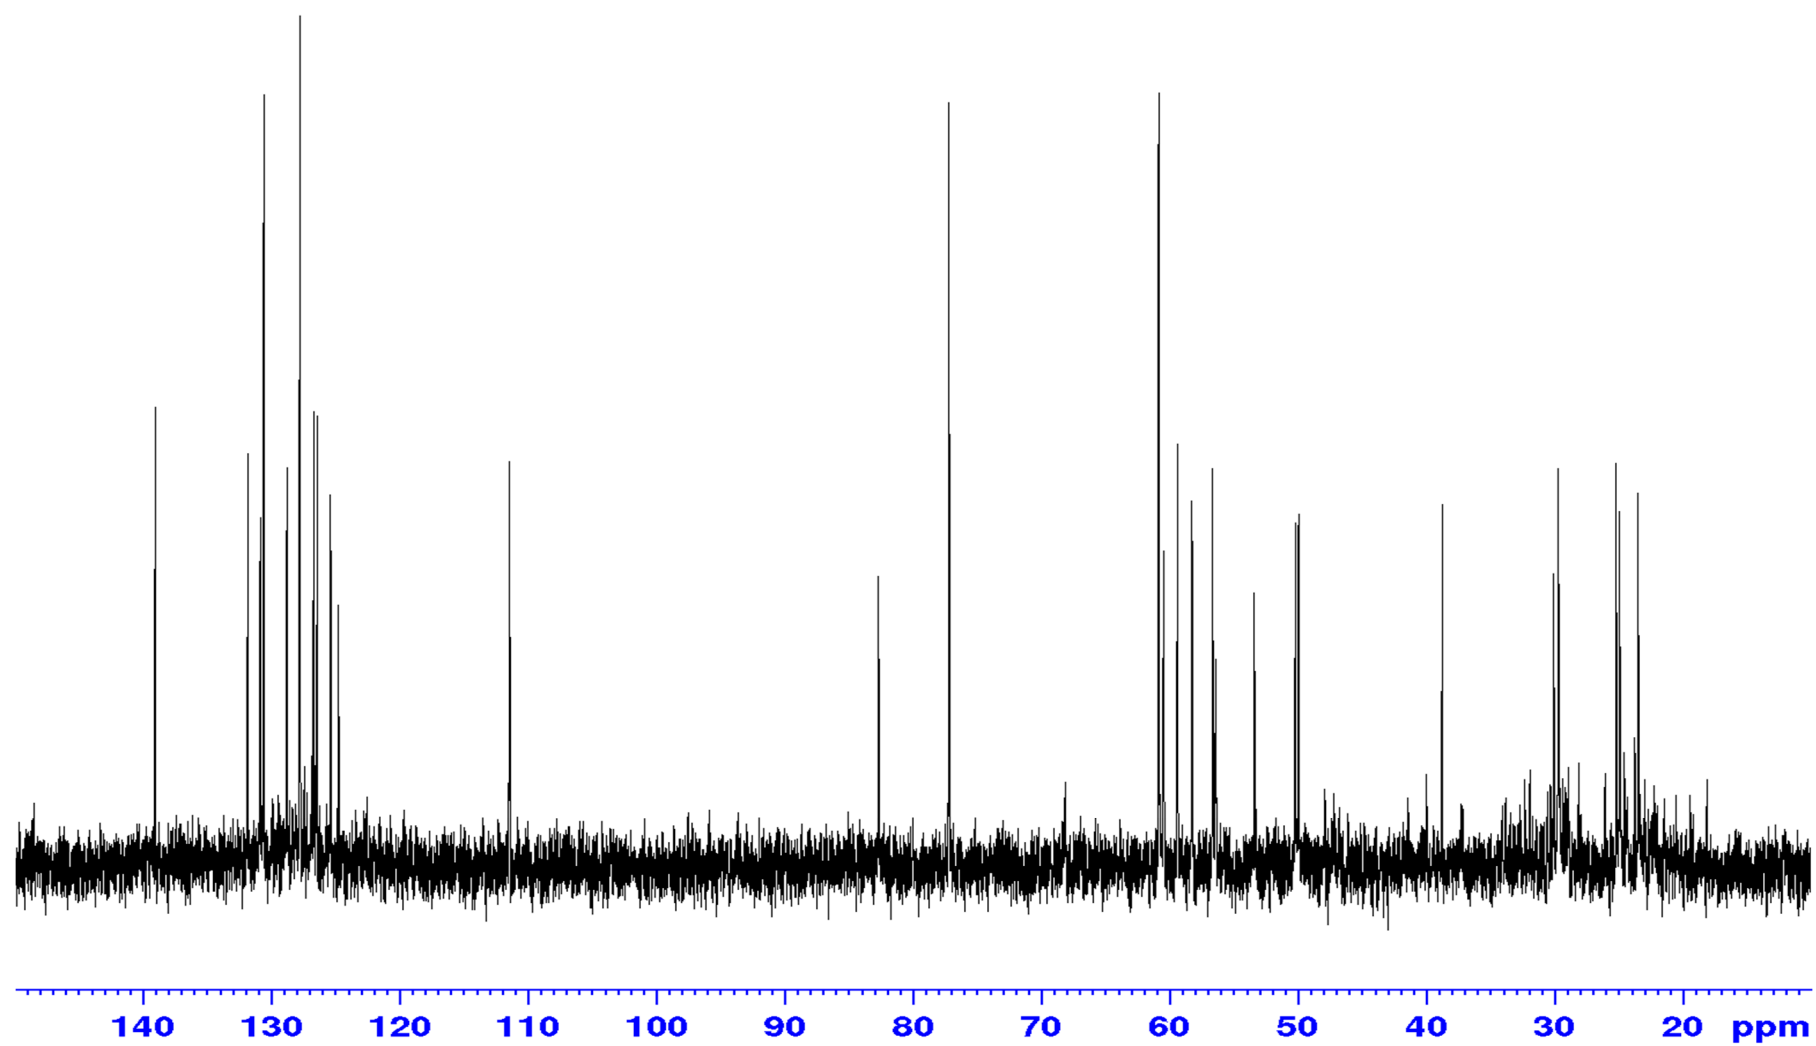

Figure S17. DEPT 90 NMR (100 MHz,  $\text{CDCl}_3$ ) spectrum of trikoramide D (3).

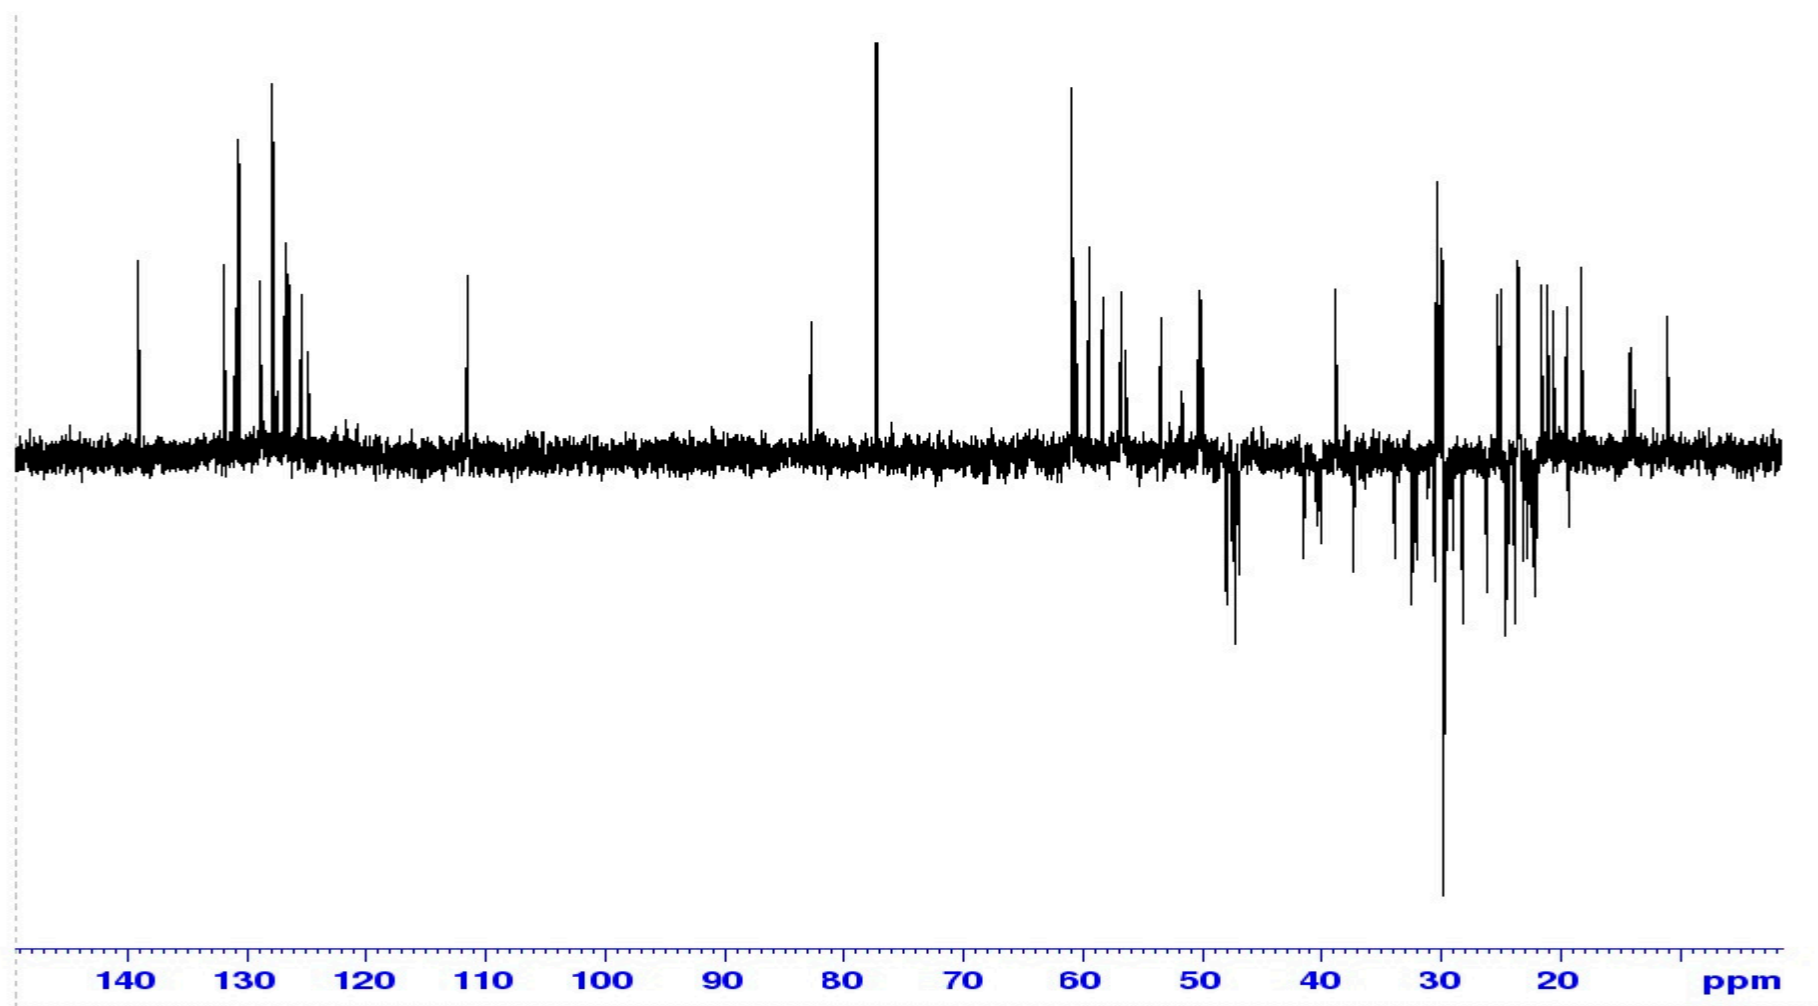

**Figure S18.** DEPT 135 NMR (100 MHz,  $\text{CDCl}_3$ ) spectrum of trikoramide D (3).

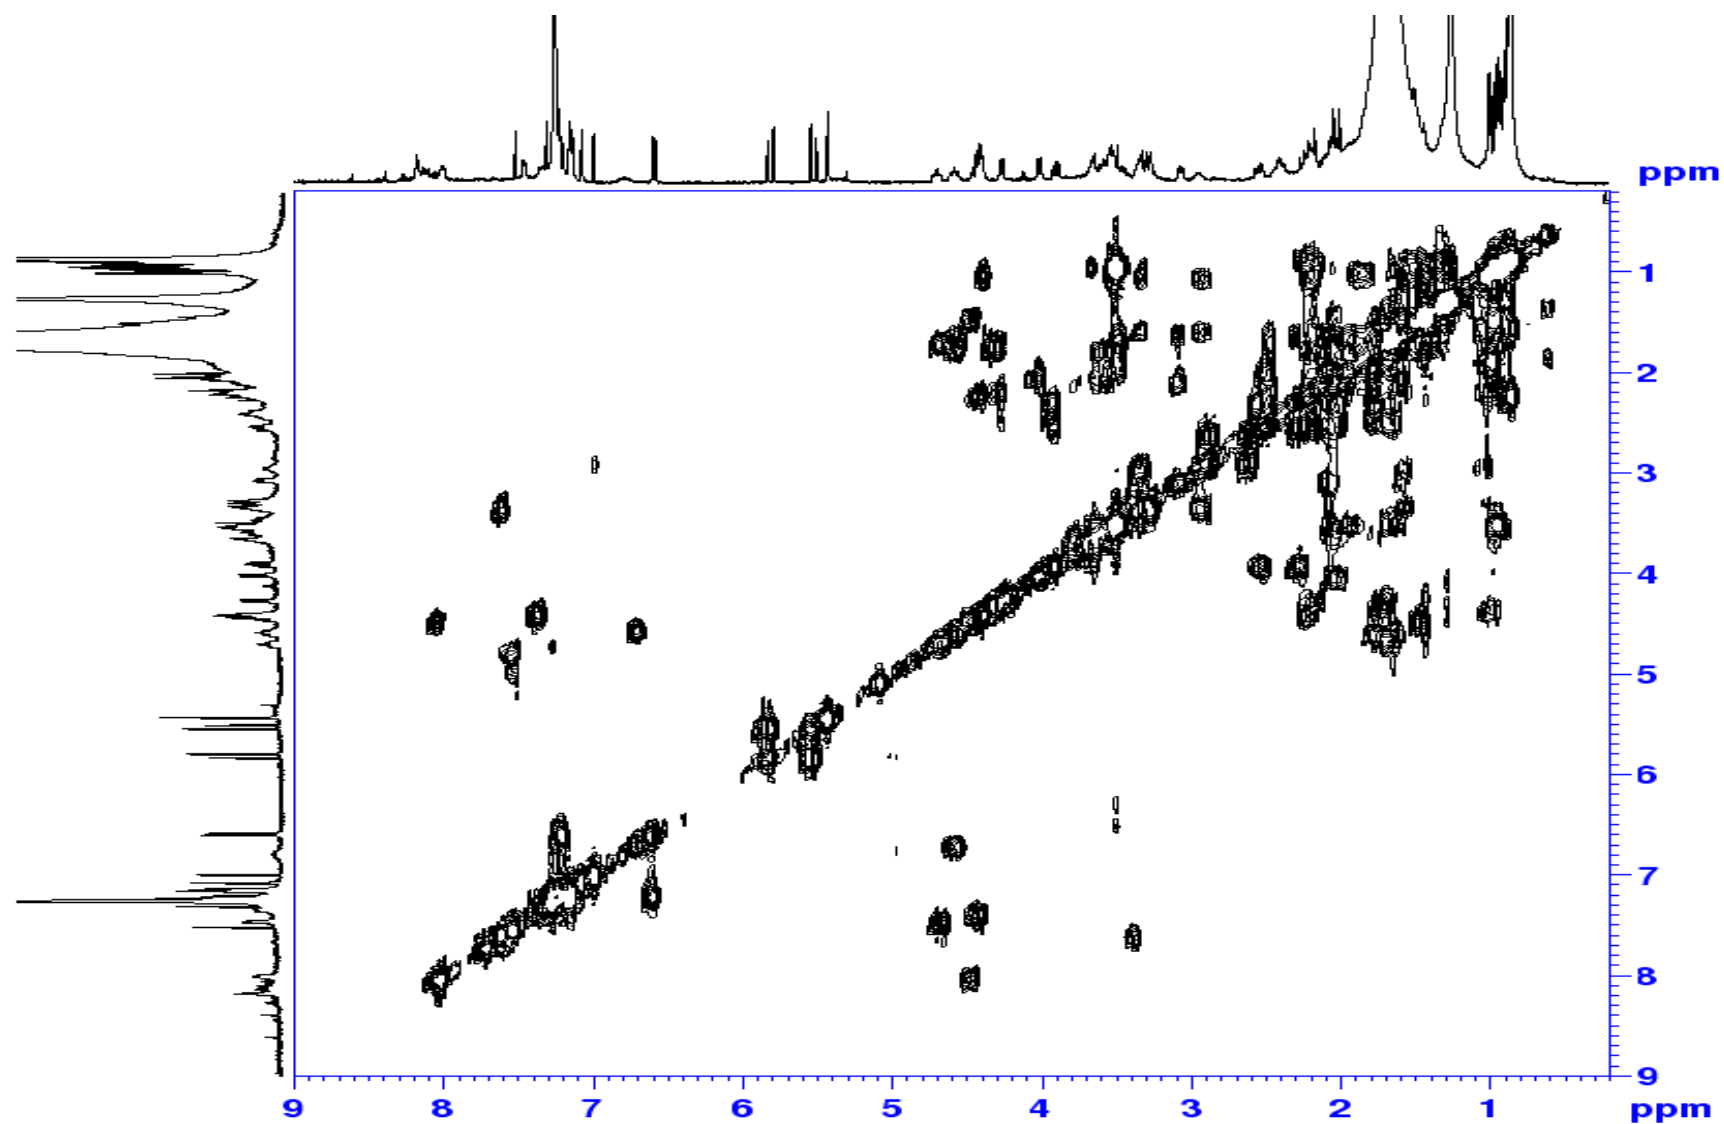

Figure S19. COSY NMR (400 MHz, CDCl<sub>3</sub>) spectrum of trikoramide D (3).

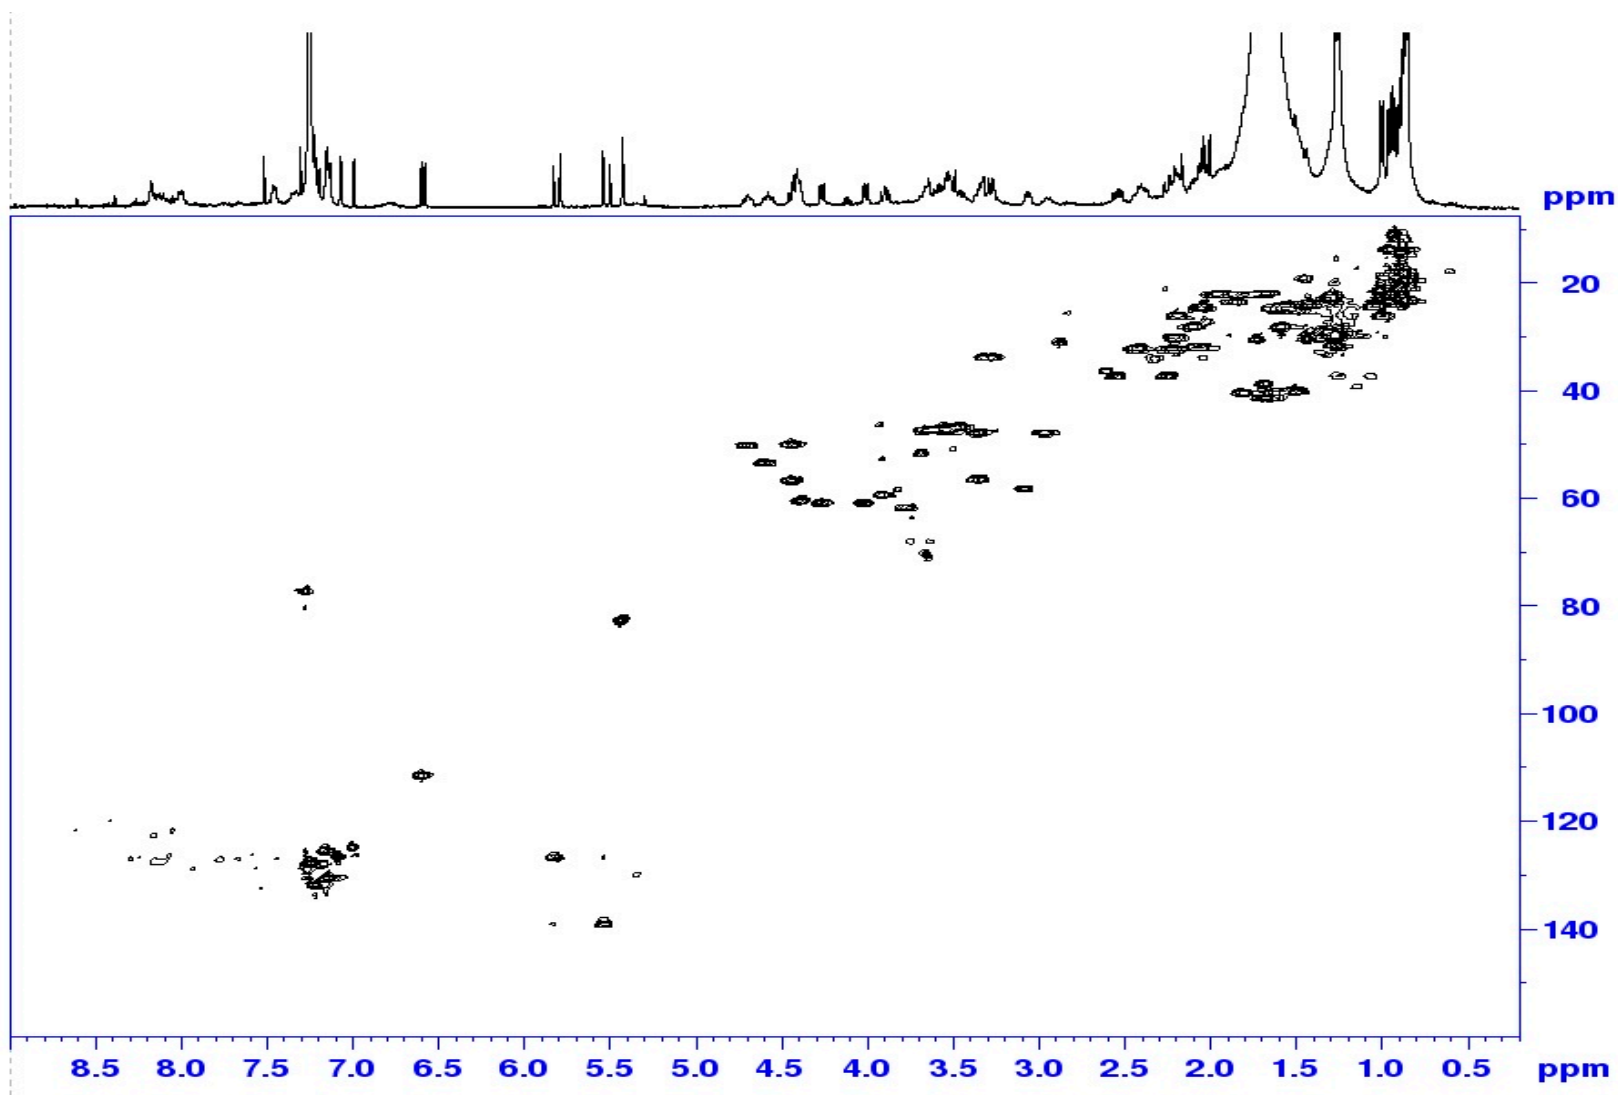

Figure S20. HSQC NMR (100 MHz, 400 MHz,  $\text{CDCl}_3$ ) spectrum of trikoramide D (3).

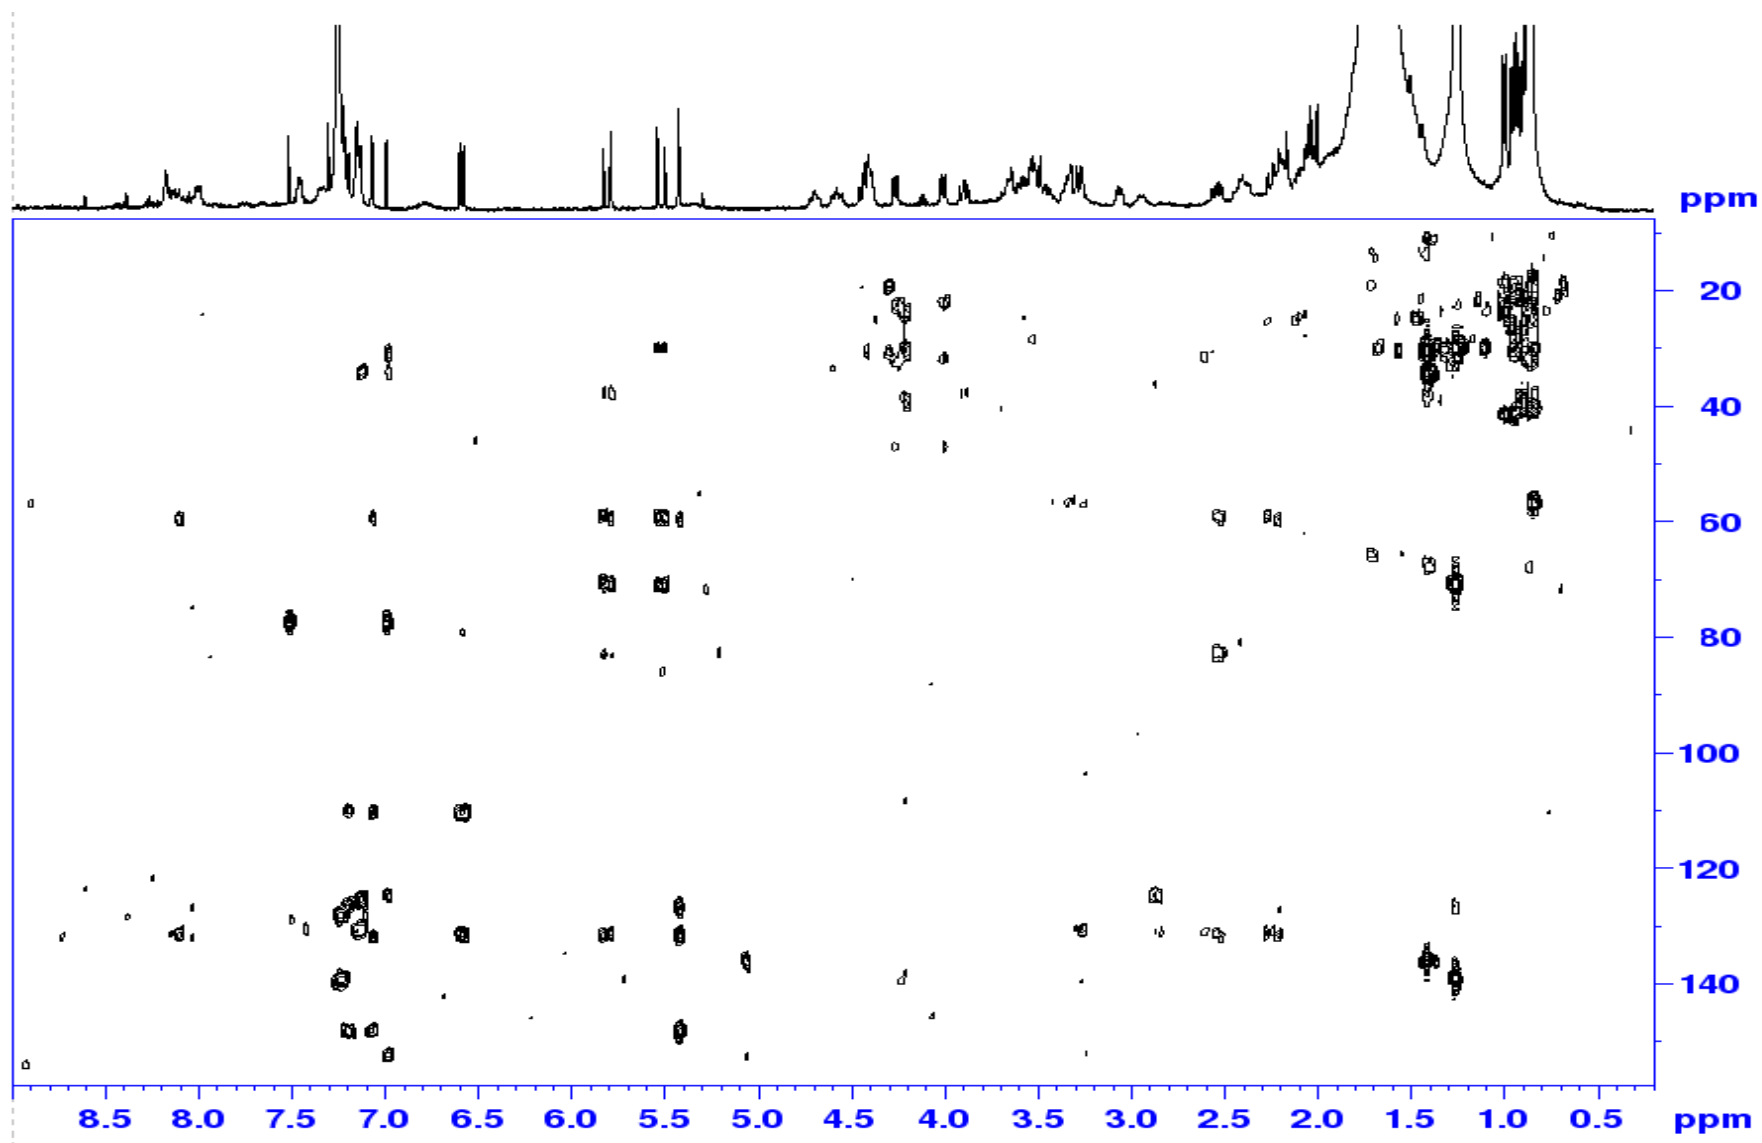

Figure S21. HMBC NMR (100 MHz, 400 MHz,  $\text{CDCl}_3$ ) spectrum of trikoramide D (3).
